# Supplementary material
Source: PubMed Central journal article supplement (PMC1693961)
Supplement: plntcell_tpc.106.043588_2.pdf [file plntcell_tpc.106.043588_2.pdf]

**Supplemental Table 1.** List of differentially regulated genes upon arabinose induced *Adr1* expression in HE140\*.

| Probeset              | jm-Number** | Annotation**                                       | 0 min                    |                          |                          | 75 min   |           |            | 180 min    |             |              | Experimental means |         |         |  |
|-----------------------|-------------|----------------------------------------------------|--------------------------|--------------------------|--------------------------|----------|-----------|------------|------------|-------------|--------------|--------------------|---------|---------|--|
|                       |             |                                                    | Fold change Adj. P-value | Fold change Adj. P-value | Fold change Adj. P-value | FBI_0min | FBI_75min | FBI_180min | HE140_0min | HE140_75min | HE140_180min | HE140_180min       |         |         |  |
| W55um190C_at          | um0424      | related to UTR2 - cell wall protein                | -3.05                    | 1.74E-01                 | 2.7                      | 7.62E-04 | -2.1      | 6.88E-03   | 291.11     | 458.57      | 1164.33      | 257.90             | 1034.53 | 530.67  |  |
| W100um22G_at          | um04124     | related to Cytochrome P450 83A1                    | -3.05                    | 1.74E-01                 | 2.7                      | 7.62E-04 | -2.1      | 6.88E-03   | 26.75      | 446.70      | 1111.13      | 7.95               | 1194.13 | 541.70  |  |
| C55um21G_at           | um04571     | - Ssp1 - putative dioxygenase Ssp1                 | 1.33                     | 9.78E-01                 | 3.0                      | 5.32E-05 | -2.2      | 8.44E-04   | 114.50     | 330.73      | 729.17       | 156.10             | 993.77  | 331.77  |  |
| W55um02G_at           | um02390     | related to alpha, alpha-trehalose-phosphate synth  | 1.07                     | 9.98E-01                 | 2.4                      | 9.79E-04 | -1.1      | 7.57E-01   | 188.70     | 142.67      | 163.13       | 200.00             | 324.83  | 152.97  |  |
| C25um106G_at          | um04166     | hypothetical protein                               | 1.06                     | 9.91E-01                 | 2.1                      | 4.36E-05 | -1.1      | 7.57E-01   | 261.10     | 291.17      | 119.70       | 170.20             | 1166.83 | 13.27   |  |
| W10um155G_at          | um04954     | hypothetical protein                               | 1.06                     | 9.91E-01                 | 2.2                      | 4.34E-05 | -1.0      | 8.81E-01   | 65.40      | 59.77       | 60.70        | 69.50              | 131.37  | 62.30   |  |
| W15um279G_at          | um05654     | probable ras-related GTP-binding protein           | 1.11                     | 9.78E-01                 | 2.1                      | 1.68E-05 | 1.3       | 2.66E-02   | 181.85     | 331.97      | 249.63       | 206.15             | 709.07  | 327.63  |  |
| W13um227G_at          | um11672     | related to Protein farnesyltransferase alpha subu  | -1.09                    | 9.83E-01                 | 3.1                      | 4.09E-07 | -2.2      | 1.03E-05   | 157.95     | 296.47      | 150.30       | 145.60             | 916.50  | 335.23  |  |
| C70um145G_at***       | um05348     | related to RAB1 - protein farnesyltransferase, bel | -1.24                    | 9.78E-01                 | 3.0                      | 4.21E-04 | -1.6      | 4.52E-03   | 248.65     | 295.93      | 361.50       | 341.00             | 253.67  | 67.43   |  |
| W60um32G_at           | um04526     | hypothetical protein                               | -1.10                    | 9.91E-01                 | 7.0                      | 4.37E-07 | -2.1      | 6.59E-01   | 48.10      | 39.90       | 32.87        | 41.80              | 286.90  | 30.03   |  |
| W60um167G_at          | um04248     | putative protein                                   | 1.21                     | 9.91E-01                 | 12.1                     | 6.73E-06 | -1.2      | 6.24E-01   | 9.30       | 12.37       | 7.67         | 10.85              | 137.53  | 6.17    |  |
| C100um020G_at         | um00860     | conserved hypothetical protein                     | 1.11                     | 9.78E-01                 | 2.6                      | 7.61E-07 | -1.2      | 5.77E-02   | 55.75      | 62.60       | 48.93        | 61.95              | 166.10  | 60.37   |  |
| W30um110G_at          | um00578     | - BW1 - locus protein W1                           | 1.31                     | 9.78E-01                 | 4.7                      | 1.05E-04 | -2.3      | 1.02E-02   | 33.80      | 38.63       | 15.13        | 25.55              | 183.73  | 31.87   |  |
| UG16-16101-80e12_RC_* | um01039     | conserved hypothetical Ustilago-specific protein   | -1.02                    | 9.98E-01                 | 4.0                      | 4.37E-06 | -1.4      | 9.49E-01   | 343.45     | 319.03      | 343.45       | 340.45             | 1406.90 | 372.03  |  |
| W25um110G_at          | um00577     | - Mating-type locus allele B1 protein              | -1.25                    | 9.91E-01                 | 18.0                     | 2.43E-05 | -1.6      | 2.90E-01   | 7.00       | 15.53       | 6.03         | 5.05               | 322.27  | 10.73   |  |
| CLUSTER67_RC_at       | um11658     | hypothetical protein                               | -1.03                    | 9.98E-01                 | 4.1                      | 6.72E-06 | 1.1       | 7.88E-01   | 16.60      | 25.47       | 21.67        | 16.30              | 106.23  | 23.87   |  |
| C20um077G_at          | um03317     | related to PRM1 - Pheromone-regulated multispa     | 1.24                     | 9.80E-01                 | 4.4                      | 2.15E-08 | -1.7      | 1.65E-04   | 54.70      | 88.53       | 56.43        | 68.15              | 389.90  | 96.77   |  |
| W70um23G_at           | um03144     | probable lathrin-associated adaptor complex me     | -1.13                    | 9.78E-01                 | 2.7                      | 1.08E-04 | -1.7      | 1.94E-03   | 209.80     | 222.57      | 158.37       | 186.05             | 851.73  | 240.53  |  |
| W120um091G_at         | um02410     | hypothetical protein                               | 1.06                     | 9.91E-01                 | 5.7                      | 1.61E-08 | -2.2      | 2.43E-05   | 173.65     | 290.73      | 143.67       | 184.35             | 1670.90 | 311.87  |  |
| C85um132G_at          | um05182     | hypothetical protein                               | 1.11                     | 9.78E-01                 | 2.8                      | 1.67E-07 | -1.0      | 8.02E-01   | 53.55      | 56.87       | 53.03        | 59.70              | 159.67  | 54.47   |  |
| C25um007G_at***       | um05356     | hypothetical protein                               | 1.18                     | 9.78E-01                 | 12.1                     | 5.41E-08 | -2.8      | 1.30E-04   | 42.75      | 58.57       | 21.03        | 52.25              | 717.47  | 62.90   |  |
| W5um130G_at           | um03782     | hypothetical protein                               | 1.23                     | 9.78E-01                 | 3.5                      | 1.08E-04 | -1.6      | 4.52E-03   | 34.85      | 45.57       | 26.73        | 47.75              | 831.07  | 46.77   |  |
| W10um280G_at          | um00384     | hypothetical protein                               | 1.23                     | 9.78E-01                 | 32.3                     | 1.24E-08 | -1.7      | 3.26E-02   | 41.70      | 33.00       | 43.60        | 52.35              | 1091.47 | 27.77   |  |
| W10um286G_at          | um00530     | hypothetical protein                               | 1.33                     | 9.78E-01                 | 12.9                     | 3.49E-06 | -1.4      | 3.56E-01   | 5.95       | 9.10        | 10.53        | 8.30               | 127.00  | 16.07   |  |
| C140um075G_at         | um06071     | related to Para-nitrobenzyl esterase               | 1.08                     | 9.98E-01                 | 14.4                     | 5.36E-07 | -1.7      | 4.89E-02   | 56.90      | 224.57      | 165.50       | 62.85              | 3099.47 | 305.87  |  |
| C15um075G_at          | um06071     | related to Para-nitrobenzyl esterase               | -1.11                    | 9.78E-01                 | 2.1                      | 9.74E-04 | -1.1      | 6.58E-02   | 34.55      | 177.15      | 194.33       | 71.75              | 414.40  | 122.47  |  |
| W160um054G_at         | um11450     | - Hgl1 - Hgl1p, required for dimorphism and telos  | -1.03                    | 9.98E-01                 | 2.5                      | 7.10E-06 | -1.3      | 6.48E-02   | 320.55     | 382.20      | 352.13       | 315.25             | 944.57  | 745.70  |  |
| W55um065G_at          | um10886     | conserved hypothetical protein                     | -1.03                    | 9.98E-01                 | 2.2                      | 1.29E-05 | -1.0      | 9.11E-01   | 737.10     | 671.20      | 776.40       | 706.10             | 1462.77 | 606.10  |  |
| W50um041G_at          | um05386     | hypothetical protein                               | 1.21                     | 9.78E-01                 | 5.1                      | 5.45E-07 | -1.2      | 2.76E-01   | 270.05     | 188.60      | 222.53       | 330.80             | 963.53  | 265.00  |  |
| W55um007G_at          | um05048     | related to PRM1 - protein farnesyltransferase, bel | 1.02                     | 9.98E-01                 | 3.0                      | 4.21E-04 | -1.6      | 4.52E-03   | 261.10     | 291.17      | 119.70       | 170.20             | 1166.83 | 13.27   |  |
| C112um175G_at         | um02173     | - Prf1 - pheromone response factor Prf1            | 1.28                     | 9.84E-01                 | 3.1                      | 7.51E-07 | 4.1       | 1.43E-07   | 363.45     | 607.13      | 727.73       | 471.40             | 2212.13 | 876.97  |  |
| W40um026G_at          | um02683     | - Pra1 - a2-pheromone receptor Pra1                | 1.63                     | 1.85E-01                 | 3.5                      | 1.12E-07 | -3.8      | 8.64E-08   | 428.45     | 136.07      | 607.60       | 693.60             | 3643.93 | 1406.00 |  |
| W40um030G_at          | um05288     | related to STE6 - ABC transporter                  | 1.57                     | 9.78E-01                 | 5.3                      | 7.66E-04 | -1.7      | 1.66E-05   | 36.90      | 150.20      | 13.17        | 68.45              | 797.40  | 220.77  |  |
| W45um029G_at          | um05288     | related to STE6 - ABC transporter                  | 1.57                     | 9.78E-01                 | 5.3                      | 7.66E-04 | -1.7      | 1.66E-05   | 36.90      | 150.20      | 13.17        | 68.45              | 797.40  | 220.77  |  |
| UG14-15101-91d8_RC_*  | um11679     | related to STE14 - farnesyl cysteine carboxyl-met  | -1.02                    | 9.98E-01                 | 3.0                      | 1.48E-08 | -2.0      | 9.88E-07   | 466.10     | 374.60      | 212.60       | 474.20             | 1136.43 | 432.73  |  |
| W71um079G_at          | none        | no annotation available                            | 1.18                     | 9.91E-01                 | 2.8                      | 4.86E-04 | 1.2       | 4.72E-01   | 89.35      | 80.30       | 60.40        | 105.70             | 219.37  | 74.40   |  |
| C44um147G_at          | um11999     | related to CDC28 - cyclin-dependent protein kin    | -1.02                    | 9.98E-01                 | 2.2                      | 1.02E-05 | -1.2      | 1.58E-01   | 160.00     | 139.70      | 147.87       | 158.50             | 309.20  | 125.83  |  |
| W30um105G_at          | um03144     | conserved hypothetical protein                     | 1.33                     | 9.88E-01                 | 14.8                     | 1.01E-05 | -1.6      | 1.01E-05   | 49.15      | 8.43        | 31.63        | 66.50              | 131.73  | 14.57   |  |
| W150um054G_at         | um03144     | conserved hypothetical protein                     | -1.07                    | 9.98E-01                 | 3.0                      | 4.97E-08 | -1.2      | 4.82E-02   | 331.65     | 371.30      | 381.60       | 371.30             | 2183.60 | 510.60  |  |
| EST10um006_at***      | um02304     | putative protein                                   | 1.00                     | 1.00E+00                 | 3.1                      | 7.16E-09 | -1.4      | 4.58E-04   | 468.65     | 301.37      | 423.17       | 469.60             | 924.30  | 309.70  |  |
| C25um258G_at          | um05109     | putative protein                                   | -1.04                    | 9.91E-01                 | 2.2                      | 1.17E-06 | -1.0      | 9.09E-01   | 676.75     | 454.73      | 502.10       | 651.00             | 1009.50 | 495.93  |  |
| W20um276G_at          | um05997     | hypothetical protein                               | 1.10                     | 9.78E-01                 | 3.5                      | 9.41E-09 | -1.2      | 7.31E-02   | 114.55     | 68.07       | 66.03        | 126.75             | 243.40  | 56.87   |  |
| W20um256G_at          | um05997     | hypothetical protein                               | 1.10                     | 9.78E-01                 | 3.5                      | 9.41E-09 | -1.2      | 7.31E-02   | 114.55     | 68.07       | 66.03        | 126.75             | 243.40  | 56.87   |  |
| W80um091G_at          | um10152     | - Don1 - cytokinesis protein Don1                  | -1.04                    | 9.94E-01                 | 2.0                      | 7.08E-06 | -1.3      | 7.65E-03   | 173.05     | 142.83      | 193.47       | 167.40             | 292.53  | 145.03  |  |
| C75um055G_at          | um03982     | hypothetical protein                               | 1.04                     | 9.98E-01                 | 2.7                      | 3.29E-06 | -2.2      | 3.00E-05   | 65.95      | 49.10       | 93.40        | 69.15              | 135.87  | 41.87   |  |
| W55um026G_at          | um04997     | putative protein                                   | 1.22                     | 9.78E-01                 | 3.9                      | 1.42E-06 | -1.7      | 3.23E-03   | 78.00      | 52.93       | 116.10       | 96.20              | 209.63  | 66.47   |  |
| C45um039G_at          | um03982     | hypothetical protein                               | 1.04                     | 9.98E-01                 | 3.4                      | 1.45E-05 | -1.6      | 1.97E-02   | 62.35      | 62.35       | 97.27        | 62.35              | 206.77  | 58.83   |  |
| C75um007G_at          | um05344     | conserved hypothetical protein                     | 1.07                     | 9.91E-01                 | 5.2                      | 6.30E-09 | -2.8      | 4.00E-07   | 250.30     | 222.83      | 697.57       | 266.95             | 1155.43 | 248.07  |  |
| W60um280G_at          | um00375     | hypothetical protein                               | 1.29                     | 9.78E-01                 | 5.2                      | 8.80E-07 | -3.7      | 8.94E-06   | 58.25      | 56.60       | 196.53       | 75.90              | 292.50  | 52.63   |  |
| W82um185G_at          | um05483     | hypothetical protein                               | -1.05                    | 9.98E-01                 | 3.5                      | 8.80E-06 | -2.1      | 6.00E-04   | 34.80      | 43.03       | 84.13        | 33.55              | 153.03  | 38.93   |  |
| W40um291G_at          | um04826     | probable quinacrine permease                       | 1.04                     | 9.91E-01                 | 3.7                      | 1.45E-05 | -1.6      | 1.97E-02   | 318.05     | 6.92        | 1438.07      | 734.13             | 2639.57 | 744.13  |  |
| W16um206G_at          | um00823     | hypothetical protein                               | 1.45                     | 9.33E-01                 | 3.4                      | 4.08E-06 | -1.5      | 1.27E-02   | 47.65      | 53.07       | 93.63        | 71.60              | 184.10  | 60.83   |  |
| C87um130G_at          | um03694     | conserved hypothetical protein                     | 1.13                     | 9.78E-01                 | 4.2                      | 1.48E-08 | -1.3      | 6.91E-03   | 142.95     | 167.57      | 269.03       | 163.00             | 699.50  | 201.00  |  |
| C61um244G_at          | um11223     | conserved hypothetical protein                     | -1.26                    | 9.78E-01                 | 1.2                      | 1.59E-01 | -2.1      | 2.44E-04   | 684.20     | 413.57      | 629.13       | 539.20             | 508.10  | 297.10  |  |
| W145um002G_at         | um03905     | conserved hypothetical protein                     | -1.05                    | 9.98E-01                 | 2.9                      | 1.01E-05 | -1.0      | 9.15E-04   | 249.50     | 249.50      | 361.50       | 1092.40            | 508.10  | 323.13  |  |
| W115um107G_at         | um10142     | putative protein                                   | -1.17                    | 9.91E-01                 | 5.0                      | 5.83E-05 | -1.1      | 7.72E-01   | 132.15     | 14.87       | 50.13        | 115.75             | 77.17   | 53.10   |  |
| C145um076G_at         | um03325     | probable general amino acid permease               | -1.28                    | 9.78E-01                 | 5.3                      | 5.26E-07 | -3.6      | 6.59E-06   | 1050.45    | 93.07       | 282.37       | 852.40             | 493.13  | 77.17   |  |
| C65um222G_at          | um14332     | conserved hypothetical protein                     | -1.59                    | 9.78E-01                 | 6.5                      | 1.06E-04 | -4.7      | 5.44E-04   | 2880.65    | 211.83      | 1284.33      | 2061.25            | 1412.10 | 259.70  |  |
| W10um22G_at           | um01432     | related to ATP-binding cassette transporter prot   | -1.17                    | 9.91E-01                 | 10.0                     | 9.74E-06 | -1.6      | 6.58E-02   | 240.60     | 240.60      | 351.50       | 1775.80            | 651.47  | 111.07  |  |
| C158um132G_at**       | um10189     | - Sid2 - Ferrichrome siderophore peptide synthet   | -1.67                    | 9.78E-01                 | 10.4                     | 9.15E-05 | -3.3      | 1.30E-02   | 834.60     | 40.67       | 187.27       | 647.40             | 436.63  | 54.20   |  |
| W170um132G_at         | um10188     | - L-Ornithine N5-oxigenase                         | -2.39                    | 9.61E-01                 | 9.8                      | 3.92E-04 | -3.1      | 3.47E-02   | 2393.55    | 79.87       | 292.03       | 1541.55            | 837.00  | 86.60   |  |
| W60um222G_at          | um01433     | related to Enoyl-CoA hydratase, mitochondrial pr   | -1.87                    | 9.78E-01                 | 9.7                      | 1.46E-04 | -5.5      | 1.59E-03   | 2105.90    | 60.70       | 481.10       | 1481.80            | 605.50  | 81.80   |  |
| C55um222G_at          | um14134     | related to Ferrichrome siderophore peptide synth   | -2.07                    | 9.78E-01                 | 64.2                     | 2.42E-05 | -25.3     | 2.87E-05   | 2121.95    | 10.20       | 431.57       | 1489.00            | 731.90  | 15.03   |  |
| C80um068G_at          | um03535     | hypothetical protein                               | -1.07                    | 9.98E-01                 | 4.4                      | 3.22E-04 | -1.5      | 2.22E-01   | 181.05     | 181.05      | 181.05       | 181.05             | 181.05  | 92.43   |  |
| W66um136G_at          | um03535     | hypothetical protein                               | -1.07                    | 9.98E-0                  |                          |          |           |            |            |             |              |                    |         |         |  |

|                    |           |                                                                 |      |          |     |          |       |          |         |        |         |         |         |        |
|--------------------|-----------|-----------------------------------------------------------------|------|----------|-----|----------|-------|----------|---------|--------|---------|---------|---------|--------|
| UG16-1614-82d11_RC | um11690   | - related to KELL3 - similarity to Kel2p and Kel1p              | 1.02 | 9.98E-01 | 3.6 | 2.84E-05 | -2.6  | 3.81E-04 | 113.80  | 19.93  | 61.20   | 120.55  | 73.80   | 23.17  |
| C10um086c_at       | um01963   | - related to NSR1 - nuclear localization sequence b             | 1.05 | 9.98E-01 | 4.2 | 6.02E-06 | -5.1  | 6.27E-06 | 909.10  | 128.97 | 474.87  | 995.30  | 542.53  | 89.67  |
| W60um296c_at       | um03840   | - hypothetical protein                                          | 1.15 | 9.98E-01 | 1.9 | 9.50E-05 | -2.1  | 6.27E-05 | 195.95  | 78.90  | 131.07  | 229.80  | 154.17  | 63.70  |
| W110um099c_at      | um01751   | - related to RNP arginine N-methyltransferase                   | 1.17 | 9.98E-01 | 2.1 | 7.85E-05 | -1.7  | 1.02E-04 | 585.05  | 106.65 | 361.20  | 1216.00 | 626.13  | 606.13 |
| W105um129c_at      | um03724   | - related to LHP1 - RNA binding protein                         | 1.14 | 9.98E-01 | 3.9 | 4.62E-07 | -3.1  | 3.38E-06 | 1158.85 | 188.97 | 585.77  | 1344.05 | 750.60  | 187.30 |
| C110um131g_at      | um05214   | - probable DEAD box protein (putative RNA helicase)             | 1.03 | 9.98E-01 | 2.1 | 4.77E-05 | -1.8  | 6.18E-04 | 385.25  | 136.37 | 228.67  | 399.60  | 291.73  | 130.63 |
| W30um184c_at       | um08082   | - probable RR1 - involved in the regulation of ribosome         | 1.09 | 9.91E-01 | 5.1 | 1.43E-06 | -3.9  | 9.90E-06 | 847.30  | 106.07 | 372.10  | 927.25  | 545.17  | 95.27  |
| W15um225c_at       | um10063   | - conserved hypothetical protein                                | 1.11 | 9.91E-01 | 2.8 | 9.79E-05 | -3.0  | 8.47E-07 | 390.20  | 72.87  | 178.07  | 435.85  | 250.67  | 59.77  |
| W15um098c_at       | um04361   | - related to putative protein kinase                            | 1.11 | 9.91E-01 | 2.1 | 7.88E-06 | -2.2  | 2.08E-08 | 313.70  | 629.00 | 1847.33 | 3470.15 | 1939.40 | 553.57 |
| C30um008c_at       | um04361   | - related to KR11 - KRRI-Interacting protein 1                  | 1.09 | 9.91E-01 | 2.5 | 1.22E-05 | -3.2  | 2.65E-06 | 183.85  | 46.20  | 121.43  | 200.75  | 117.30  | 38.07  |
| W20um076g_at       | um05357   | - related to S521 - regulator protein involved in pili          | 1.13 | 9.78E-01 | 2.5 | 3.84E-06 | -2.4  | 8.10E-06 | 1392.15 | 375.43 | 922.30  | 1586.40 | 942.40  | 382.73 |
| W80um202c_at       | um08084   | - probable ZUO1 - zootin                                        | 1.12 | 9.78E-01 | 2.7 | 1.27E-06 | -2.3  | 8.32E-06 | 829.55  | 206.50 | 519.73  | 933.40  | 553.93  | 227.10 |
| W165um010c_at      | um08113   | - related to 60S ribosomal protein I7, mitochondria             | 1.13 | 9.78E-01 | 2.1 | 9.67E-04 | -2.7  | 9.70E-04 | 345.10  | 93.93  | 400.83  | 705.00  | 576.63  | 146.73 |
| C15um018c_at       | um01211   | - conserved hypothetical protein                                | 1.19 | 9.89E-01 | 4.2 | 3.37E-05 | -2.8  | 5.31E-04 | 521.70  | 108.13 | 279.10  | 646.25  | 451.10  | 97.83  |
| W50um806c_at       | um03241   | - probable KRH1 - required for 40S ribosome biogenesis          | 1.02 | 9.98E-01 | 2.2 | 6.11E-04 | -2.2  | 8.90E-04 | 356.70  | 137.73 | 238.80  | 367.40  | 298.70  | 107.97 |
| C90um118c_at       | um04021   | - probable KR103 - nonsense-mediated mRNA decay                 | 1.22 | 9.91E-01 | 8.9 | 2.40E-04 | -7.5  | 5.70E-04 | 256.50  | 27.77  | 170.40  | 320.85  | 216.63  | 24.90  |
| W75um186g_at       | um04751   | - related to RRS1 - regulator of ribosome biogenesis            | 1.09 | 9.98E-01 | 8.0 | 2.20E-04 | -5.2  | 1.44E-03 | 266.75  | 32.87  | 183.97  | 296.80  | 212.97  | 36.97  |
| UG23-1p18-134g5_RC | atum00328 | - putative protein                                              | 1.11 | 9.88E-01 | 2.7 | 1.05E-05 | -2.8  | 1.31E-05 | 178.80  | 53.67  | 121.37  | 199.40  | 148.87  | 43.90  |
| CLUSTER30_RC       | um04291   | - conserved hypothetical protein                                | 1.24 | 9.78E-01 | 3.7 | 3.80E-05 | -3.4  | 8.78E-05 | 333.20  | 91.20  | 266.40  | 422.90  | 330.83  | 80.30  |
| C60um283c_at       | um03310   | - related to WD-repeat protein crf3                             | 1.13 | 9.88E-01 | 2.1 | 3.33E-04 | -2.0  | 4.86E-04 | 444.05  | 182.83 | 297.07  | 504.65  | 374.53  | 146.73 |
| C100um076g_at      | um03340   | - probable NHP2 - nucleolar RNA processing protein              | 1.17 | 9.78E-01 | 2.2 | 1.89E-04 | -1.8  | 2.76E-03 | 687.95  | 271.80 | 460.00  | 816.75  | 602.73  | 256.50 |
| C120um003g_at      | um01254   | - conserved hypothetical protein                                | 1.14 | 9.91E-01 | 2.1 | 8.93E-04 | -1.6  | 1.87E-02 | 123.20  | 55.87  | 92.33   | 143.10  | 117.83  | 57.13  |
| W85um136g_at       | um02564   | - conserved hypothetical protein                                | 1.20 | 9.78E-01 | 2.5 | 4.04E-04 | -1.8  | 9.52E-03 | 222.85  | 87.17  | 143.93  | 277.00  | 213.43  | 80.33  |
| W55um249c_at       | um01111   | - probable Nip3 - putative protein                              | 1.11 | 9.91E-01 | 3.3 | 2.46E-05 | -2.1  | 4.33E-05 | 158.05  | 35.40  | 95.23   | 178.95  | 116.63  | 30.27  |
| C25um041g_at       | um05392   | - Nip3 - putative protein                                       | 1.10 | 9.91E-01 | 2.4 | 3.41E-04 | -2.8  | 1.69E-04 | 363.20  | 121.17 | 249.23  | 414.90  | 296.90  | 90.37  |
| W120um056g_at      | um01867   | - conserved hypothetical protein                                | 1.19 | 9.78E-01 | 2.7 | 1.52E-05 | -3.0  | 7.13E-06 | 187.75  | 56.93  | 142.47  | 226.55  | 153.80  | 45.97  |
| CLUSTER60_RC       | um01606   | - related to importin beta homolog Kap119p                      | 1.13 | 9.78E-01 | 3.2 | 3.08E-06 | -3.6  | 1.95E-06 | 818.35  | 214.23 | 644.57  | 935.15  | 679.67  | 180.60 |
| UG19-116-125b6_RC  | at03376   | - conserved hypothetical protein                                | 1.20 | 9.78E-01 | 2.4 | 2.03E-06 | -2.1  | 2.95E-03 | 379.10  | 114.30 | 260.43  | 459.85  | 350.80  | 47.70  |
| C70um284c_at       | um01577   | - related to translation initiation factor eIF-3                | 1.26 | 9.38E-01 | 2.4 | 2.33E-06 | -1.8  | 8.27E-05 | 1287.50 | 521.50 | 996.97  | 1639.65 | 1222.03 | 558.57 |
| C80um165c_at       | um10112   | - hypothetical protein                                          | 1.06 | 9.91E-01 | 2.4 | 1.90E-05 | -1.9  | 3.07E-04 | 271.10  | 90.00  | 176.50  | 288.60  | 214.10  | 93.20  |
| C90um139g_at       | um10241   | - related to DBP8 - ATP-dependent RNA helicase                  | 1.06 | 9.94E-01 | 2.3 | 1.16E-04 | -2.1  | 3.12E-04 | 247.10  | 83.43  | 160.43  | 265.90  | 191.83  | 73.97  |
| C75um105c_at       | um02262   | - probable MAK21 - protein required for 60S ribosome            | 1.28 | 9.78E-01 | 4.5 | 3.04E-05 | -4.0  | 3.04E-05 | 256.35  | 46.94  | 156.63  | 435.85  | 214.90  | 40.43  |
| C15um188c_at       | um01305   | - conserved hypothetical protein                                | 1.12 | 9.84E-01 | 3.9 | 1.10E-04 | -2.1  | 1.99E-04 | 174.10  | 50.30  | 102.30  | 202.30  | 150.03  | 27.47  |
| W30um124g_at       | um01305   | - conserved hypothetical protein                                | 1.15 | 9.91E-01 | 3.7 | 1.13E-04 | -3.3  | 2.87E-04 | 224.60  | 52.73  | 143.00  | 263.15  | 191.50  | 43.63  |
| CLUSTER46_RC       | um08335   | - putative protein                                              | 1.16 | 9.78E-01 | 2.8 | 4.72E-06 | -2.5  | 1.52E-05 | 115.85  | 163.87 | 652.67  | 614.70  | 461.20  | 144.57 |
| W90um138c_at       | um02628   | - related to DNA-directed RNA polymerase I                      | 1.33 | 9.78E-01 | 5.9 | 2.35E-06 | -4.9  | 8.04E-06 | 890.55  | 143.17 | 632.03  | 1210.85 | 825.87  | 128.93 |
| W125um209c_at      | um01213   | - related to RRP6 - ribonuclease component of the RRP           | 1.07 | 9.84E-01 | 2.9 | 2.63E-05 | -2.7  | 6.18E-05 | 140.65  | 43.23  | 84.23   | 120.60  | 116.87  | 45.10  |
| C14um227g_at       | um01467   | - probable NOP2 - nucleolar protein                             | 1.27 | 9.78E-01 | 4.1 | 1.52E-05 | -4.3  | 6.51E-05 | 507.70  | 104.70 | 341.20  | 662.70  | 430.93  | 99.90  |
| W51um113g_at       | um03495   | - probable NUP1 - nucleolar protein                             | 1.14 | 9.88E-01 | 5.0 | 1.22E-06 | -4.5  | 3.22E-06 | 506.90  | 75.10  | 305.50  | 593.85  | 374.20  | 67.90  |
| W90um163g_at       | um06078   | - probable RRP5 - processing of pre-ribosomal RNA               | 1.24 | 9.78E-01 | 5.1 | 1.24E-06 | -4.4  | 3.91E-06 | 295.30  | 45.20  | 192.37  | 378.05  | 228.23  | 42.70  |
| C65um008c_at       | um04356   | - conserved hypothetical protein                                | 1.11 | 9.78E-01 | 2.9 | 2.85E-06 | -2.9  | 3.10E-06 | 664.70  | 114.30 | 380.03  | 625.85  | 414.87  | 50.00  |
| W90um386g_at       | um04158   | - related to RRP12 - Protein required for normal protein        | 1.14 | 9.91E-01 | 4.6 | 3.21E-05 | -3.8  | 1.24E-04 | 285.55  | 50.60  | 178.00  | 330.25  | 224.07  | 46.73  |
| C75um251g_at       | um10593   | - conserved hypothetical protein                                | 1.09 | 9.94E-01 | 6.0 | 6.08E-06 | -4.2  | 5.03E-05 | 167.90  | 20.73  | 92.53   | 186.60  | 125.00  | 71.70  |
| C50um179c_at       | um01372   | - related to nuclear GTPase                                     | 1.04 | 9.98E-01 | 3.8 | 2.14E-05 | -3.2  | 9.26E-05 | 444.20  | 90.77  | 250.97  | 470.95  | 346.33  | 29.70  |
| C75um208c_at       | um01372   | - related to nuclear GTPase                                     | 1.04 | 9.98E-01 | 3.8 | 2.14E-05 | -3.2  | 9.26E-05 | 444.20  | 90.77  | 250.97  | 470.95  | 346.33  | 29.70  |
| EST10um044_at      | um02337   | - conserved hypothetical protein                                | 1.12 | 9.78E-01 | 2.4 | 9.74E-06 | -2.1  | 5.99E-05 | 303.55  | 108.80 | 213.50  | 342.15  | 262.53  | 102.27 |
| C30um134g_at       | um03110   | - related to UTP13 - U3 snoRNP protein                          | 1.07 | 9.91E-01 | 3.6 | 2.17E-06 | -3.2  | 6.94E-06 | 540.05  | 128.67 | 345.97  | 588.85  | 462.17  | 108.40 |
| C40um151g_at       | um05714   | - related to ERB1 - Protein required for maturation             | 1.15 | 9.91E-01 | 4.0 | 8.31E-06 | -2.9  | 1.08E-04 | 590.80  | 137.63 | 384.80  | 692.00  | 542.37  | 132.77 |
| C9um174c_at        | um01376   | - conserved hypothetical protein                                | 1.18 | 9.78E-01 | 3.6 | 2.15E-05 | -2.5  | 5.09E-06 | 322.75  | 61.40  | 120.10  | 256.00  | 160.40  | 60.40  |
| C40um207g_at***    | um00275   | - related to DNA polymerase V                                   | 1.18 | 9.78E-01 | 3.3 | 5.49E-06 | -3.2  | 8.71E-06 | 495.50  | 127.73 | 330.33  | 596.10  | 403.57  | 101.90 |
| C45um108c_at       | um11017   | - related to NFG2 - topoisomerase I-related protein             | 1.12 | 9.78E-01 | 2.5 | 1.38E-05 | -2.7  | 9.46E-06 | 194.75  | 64.23  | 138.07  | 220.15  | 159.83  | 51.17  |
| W7um072g_at***     | um09064   | - related to TORF4 - GTPase involved in ribosomal biogenesis    | 1.10 | 9.91E-01 | 4.2 | 4.64E-06 | -3.7  | 1.39E-05 | 372.15  | 71.53  | 239.10  | 415.35  | 297.90  | 64.57  |
| C33um089c_at       | um01823   | - probable NRP23 - protein involved in bud-site selection       | 1.10 | 9.91E-01 | 2.9 | 1.85E-05 | -2.7  | 3.28E-05 | 545.30  | 214.30 | 575.60  | 826.35  | 454.37  | 76.23  |
| W105um250g_at      | um03058   | - conserved hypothetical protein                                | 1.06 | 9.91E-01 | 2.9 | 1.48E-06 | -2.7  | 4.16E-06 | 462.10  | 109.80 | 250.17  | 494.80  | 321.93  | 92.10  |
| W5um169g_at        | um01707   | - hypothetical protein                                          | 1.06 | 9.94E-01 | 3.1 | 7.00E-06 | -2.9  | 1.39E-05 | 280.40  | 66.73  | 156.60  | 207.80  | 152.80  | 52.43  |
| C35um027g_at       | um10410   | - probable HAS1 - helicase associated with Set1p                | 1.13 | 9.91E-01 | 4.6 | 9.08E-06 | -3.8  | 3.90E-05 | 564.15  | 93.03  | 303.37  | 655.30  | 414.23  | 80.20  |
| W50um128g_at       | um01283   | - related to MTE1 - methyltransferase/hydrofolate dehydrogenase | 1.10 | 9.91E-01 | 2.4 | 3.03E-06 | -2.1  | 2.94E-05 | 890.50  | 260.90 | 537.07  | 890.50  | 622.87  | 261.27 |
| W5um153c_at        | um01283   | - related to MTE1 - methyltransferase/hydrofolate dehydrogenase | 1.02 | 9.91E-01 | 2.9 | 3.18E-05 | -2.7  | 6.18E-05 | 316.80  | 73.27  | 184.77  | 199.65  | 110.87  | 67.47  |
| W65um057g_at       | um06090   | - related to Probable RNA-binding protein sce3                  | 1.11 | 9.78E-01 | 2.1 | 1.83E-05 | -1.9  | 5.38E-05 | 1689.30 | 662.33 | 1203.70 | 1879.35 | 1365.73 | 626.07 |
| W10um073g_at       | um05722   | - probable BMS1 - GTP-binding protein, required for protein     | 1.12 | 9.91E-01 | 3.7 | 1.49E-05 | -2.8  | 3.81E-04 | 287.20  | 58.40  | 155.57  | 324.30  | 208.43  | 56.70  |
| C27um013c_at       | um11730   | - probable URA2 - multifunctional pyrimidine biosynthesis       | 1.19 | 9.78E-01 | 2.7 | 1.42E-06 | -2.3  | 8.67E-06 | 1490.25 | 487.57 | 1090.50 | 1775.40 | 1320.70 | 468.80 |
| W40um257g_at       | um06035   | - related to RRP6 - ribonuclease component of the RRP           | 1.07 | 9.84E-01 | 2.9 | 2.63E-05 | -2.7  | 6.18E-05 | 140.65  | 43.23  | 84.23   | 120.60  | 116.87  | 45.10  |
| W60um270g_at       | um06035   | - related to RRP6 - ribonuclease component of the RRP           | 1.06 | 9.91E-01 | 3.6 | 3.50E-07 | -3.3  | 9.32E-07 | 1269.45 | 267.80 | 826.40  | 1353.70 | 984.33  | 249.27 |
| C25um163c_at       | um01810   | - conserved hypothetical protein                                | 1.13 | 9.94E-01 | 6.7 | 4.76E-05 | -5.8  | 1.33E-04 | 241.65  | 28.17  | 157.90  | 274.95  | 189.77  | 29.10  |
| W35um218c_at       | um04516   | - conserved hypothetical protein                                | 1.08 | 9.98E-01 | 9.6 | 6.83E-04 | -13.0 | 3.33E-04 | 201.30  | 18.67  | 120.20  | 221.35  | 158.40  | 12.90  |
| W60um113c_at       | um01213</ |                                                                 |      |          |     |          |       |          |         |        |         |         |         |        |

|                     |         |                                                       |       |          |      |          |      |          |         |        |         |         |         |        |
|---------------------|---------|-------------------------------------------------------|-------|----------|------|----------|------|----------|---------|--------|---------|---------|---------|--------|
| C5um268G            | um04484 | - related to choline-sulfatase                        | -1.09 | 9.78E-01 | 2,4  | 2,30E-06 | -1,9 | 4,33E-05 | 198,70  | 70,30  | 120,63  | 182,70  | 167,63  | 63,70  |
| C9um257G_at         | none    | no annotation available                               | -1.16 | 9.78E-01 | 2,2  | 9,65E-06 | -1,8 | 1,40E-04 | 183,90  | 62,23  | 112,67  | 158,85  | 141,40  | 60,90  |
| W5um188G_at         | um04791 | - related to to G1/S-specific cyclin                  | -1.03 | 9.98E-01 | 3,9  | 7,61E-07 | -2,2 | 1,00E-04 | 381,50  | 75,20  | 220,40  | 372,00  | 293,00  | 99,20  |
| C8um161G_at         | um04907 | - related to PML1 - similarity to A.thaliana hyp1 pro | -1.01 | 9.98E-01 | 3,2  | 9,95E-07 | -2,1 | 1,20E-04 | 279,40  | 67,17  | 141,07  | 281,13  | 301,87  | 77,17  |
| C7um164G_at         | um04063 | putative protein                                      | -1.04 | 9.98E-01 | 2,3  | 2,40E-04 | -2,5 | 1,46E-04 | 104,95  | 31,73  | 68,17   | 110,20  | 111,87  | 27,40  |
| W2um299G            | um02997 | - related to CHO2 - phosphatidylethanolamine N-m      | -1.12 | 9.91E-01 | 3,8  | 7,59E-06 | -4,1 | 6,35E-06 | 670,25  | 110,63 | 367,57  | 603,85  | 417,97  | 90,63  |
| W5um223G_at         | um01397 | - probable REX4 - strong similarity to X.laevis XPM   | -1.03 | 9.98E-01 | 14,1 | 2,34E-06 | -6,5 | 5,98E-05 | 152,90  | 6,73   | 73,80   | 148,45  | 107,83  | 11,90  |
| UG21-1414-109c11_RC | um01015 | - conserved hypothetical protein                      | -1.08 | 9.98E-01 | 2,5  | 1,23E-04 | -1,7 | 4,33E-04 | 247,20  | 407,13 | 130,87  | 740,95  | 620,98  | 245,63 |
| CLUSTER17_RC        | um00812 | - probable bifunctional purine biosynthetic protein   | -1.01 | 9.98E-01 | 3,1  | 9,18E-05 | -2,3 | 3,09E-06 | 1181,35 | 337,67 | 689,97  | 1246,65 | 1033,77 | 121,83 |
| W10um170G_at        | um05019 | - probable SAM2 - S-adenosylmethionine synthetase     | -1.00 | 1,00E+00 | 3,2  | 4,31E-07 | -2,1 | 2,21E-05 | 2852,45 | 712,53 | 1533,07 | 2856,45 | 2266,27 | 718,13 |
| W5um32G_at          | um04934 | - related to a component of the yeast U3 snRNP R      | -1.03 | 9.98E-01 | 2,7  | 1,83E-04 | -2,5 | 3,55E-04 | 346,05  | 88,67  | 182,40  | 355,65  | 233,10  | 73,20  |
| W7um133G_at         | um05126 | - related to NCL1 - RNA (cytosine 5'-) methyltrans    | -1.07 | 9.94E-01 | 2,8  | 4,65E-05 | -2,5 | 1,53E-04 | 446,90  | 95,40  | 210,03  | 418,70  | 261,53  | 85,10  |
| W9um129G_at         | um05369 | - related to para-aminobenzoic acid synthetase        | -1.03 | 9.98E-01 | 2,4  | 5,45E-05 | -1,8 | 3,46E-04 | 225,10  | 64,80  | 137,37  | 203,60  | 150,69  | 63,40  |
| W4um301G_at         | um05169 | - related to KRE6 - beta-1,6-glucan synthetase        | -1.03 | 9.98E-01 | 2,4  | 4,57E-06 | -2,0 | 3,29E-05 | 518,45  | 143,53 | 235,63  | 504,25  | 337,50  | 115,83 |
| W4um122G_at         | um01694 | hypothetical protein                                  | -1.13 | 9.91E-01 | 2,1  | 8,13E-04 | -1,7 | 1,25E-02 | 86,85   | 32,50  | 50,63   | 76,60   | 67,30   | 30,23  |
| W17um139G_at        | um01319 | hypothetical protein                                  | -1.22 | 9.78E-01 | 2,3  | 5,40E-05 | -2,0 | 2,74E-04 | 267,05  | 81,00  | 153,40  | 219,00  | 185,63  | 75,20  |
| W17um159G_at        | um01319 | - related to RFL1 - cyclin, G1/S-specific             | -1.22 | 9.78E-01 | 2,1  | 2,95E-04 | -1,4 | 5,12E-02 | 422,60  | 202,97 | 270,33  | 359,85  | 420,93  | 194,27 |
| W10um232G_at        | um04538 | - probable DAL5 - Allantoinase and ureidocoumatin p   | -1.04 | 9.98E-01 | 3,6  | 1,48E-05 | -1,4 | 7,20E-02 | 377,40  | 120,67 | 179,07  | 418,75  | 433,67  | 125,90 |
| C12um049G           | um00105 | - probable FET3 - cell surface ferroxidase, high affi | -1.75 | 9.78E-01 | 22,5 | 2,39E-06 | -2,5 | 2,46E-02 | 3762,70 | 186,00 | 731,67  | 2747,85 | 4163,80 | 277,93 |
| W12um049G           | um10023 | - related to high-affinity iron permease              | -2.03 | 9.56E-01 | 54,0 | 5,32E-07 | -3,2 | 9,29E-03 | 3188,45 | 61,63  | 509,73  | 2165,45 | 3375,63 | 151,97 |
| EST02um143          | um03129 | hypothetical protein                                  | -1.06 | 9.94E-01 | 2,3  | 6,76E-05 | -1,8 | 1,31E-03 | 494,70  | 190,40 | 316,63  | 532,25  | 449,93  | 179,87 |
| C127um055G          | um03992 | hypothetical protein                                  | -1.05 | 9.94E-01 | 2,0  | 8,90E-05 | -1,2 | 1,25E-01 | 159,85  | 75,90  | 109,60  | 152,05  | 153,47  | 89,33  |
| W11um178G           | um02002 | hypothetical protein                                  | -1.02 | 9.98E-01 | 3,7  | 5,60E-06 | -2,2 | 3,99E-04 | 308,90  | 79,27  | 195,60  | 320,35  | 304,40  | 88,00  |
| UG24-1d14-47c8_RC   | um00813 | - conserved hypothetical protein                      | -1.39 | 9.78E-01 | 3,3  | 1,68E-04 | -2,2 | 1,04E-02 | 472,80  | 140,83 | 275,83  | 378,85  | 455,13  | 140,23 |
| UG22-1c18-45f9_RC   | um01319 | hypothetical protein                                  | -1.25 | 9.78E-01 | 3,3  | 2,54E-04 | -1,5 | 1,33E-01 | 242,65  | 66,20  | 147,17  | 202,05  | 203,33  | 100,07 |
| C8um140G            | um03761 | - related to aldehyde dehydrogenase                   | -1.46 | 9.36E-01 | 2,4  | 4,78E-04 | -1,8 | 7,50E-03 | 241,55  | 76,17  | 150,07  | 174,60  | 179,47  | 82,60  |
| C20um019G           | um06434 | - conserved hypothetical protein                      | -1.27 | 9.80E-01 | 2,1  | 1,80E-05 | -2,3 | 1,05E-05 | 965,05  | 378,50 | 707,07  | 774,75  | 805,37  | 309,20 |
| W3um174G            | um02751 | hypothetical protein                                  | -1.68 | 8,33E-01 | 4,7  | 8,19E-06 | -4,2 | 2,72E-05 | 50,60   | 7,13   | 26,57   | 30,75   | 38,17   | 5,63   |
| W4um097G            | um03995 | - conserved hypothetical protein                      | -1.00 | 9.98E-01 | 2,5  | 9,99E-06 | -1,7 | 9,74E-04 | 126,60  | 34,03  | 92,87   | 146,17  | 149,93  | 54,33  |
| C11um163G           | um00672 | - probable urate oxidase (uricase)                    | -1.00 | 1,00E+00 | 2,9  | 8,90E-05 | -2,4 | 7,03E-04 | 1120,15 | 376,13 | 864,13  | 1144,80 | 1113,30 | 366,47 |
| W4um213G            | um03658 | - conserved hypothetical protein                      | -1.11 | 9.91E-01 | 4,1  | 3,29E-05 | -2,1 | 5,53E-03 | 62,15   | 25,57  | 61,77   | 55,65   | 103,03  | 28,77  |
| C15um066G           | um04197 | - related to purine-cytosine permease                 | -1.24 | 8,33E-01 | 2,5  | 6,57E-07 | -1,3 | 6,56E-03 | 363,45  | 223,77 | 277,37  | 454,50  | 554,03  | 207,63 |
| C3um182G            | um05574 | - conserved hypothetical protein                      | -1.01 | 9.98E-01 | 2,5  | 1,45E-04 | -1,3 | 5,49E-05 | 177,65  | 112,47 | 156,60  | 179,23  | 202,10  | 116,13 |
| C4um208G            | um05720 | - conserved hypothetical protein                      | -1.04 | 9.94E-01 | 2,1  | 3,46E-06 | -1,8 | 9,44E-03 | 163,35  | 0,00   | 125,00  | 172,90  | 214,70  | 91,10  |
| C10um007G           | um10572 | - related to MET10 - sulfite reductase flavin-binding | -1.05 | 9.98E-01 | 3,6  | 1,02E-06 | -2,0 | 2,57E-04 | 873,15  | 277,20 | 504,30  | 925,70  | 1001,30 | 265,93 |
| C14um018G           | um01184 | - probable Rcp19 - 18 kD subunit of DNA-directed      | -1.03 | 9.98E-01 | 4,0  | 1,67E-07 | -2,4 | 1,34E-05 | 267,80  | 83,87  | 199,40  | 276,40  | 344,23  | 81,33  |
| CLUSTER18_RC_s      | um04076 | hypothetical protein                                  | -1.10 | 9.91E-01 | 3,5  | 8,05E-07 | -1,7 | 1,29E-03 | 252,45  | 93,40  | 159,90  | 230,30  | 326,70  | 94,17  |
| C3um256G            | um04094 | - related to gamma-actin associated protein           | -1.10 | 9.91E-01 | 6,2  | 4,85E-07 | -2,2 | 3,90E-07 | 421,75  | 245,63 | 432,37  | 586,20  | 682,47  | 71,83  |
| W4um256G            | um05786 | - related to UDP N-acetylglucosamine transporter      | -1.12 | 9.78E-01 | 7,0  | 4,78E-09 | -2,6 | 2,29E-06 | 633,50  | 105,50 | 353,10  | 565,60  | 746,63  | 135,57 |
| C7um127G            | um04875 | - conserved hypothetical protein                      | -1.19 | 9.78E-01 | 2,0  | 2,92E-05 | -1,3 | 2,15E-02 | 574,85  | 365,13 | 447,43  | 487,85  | 741,20  | 337,10 |
| W2um256G            | um05782 | - capsular-associated protein-like protein            | -1.01 | 9.98E-01 | 5,9  | 6,41E-08 | -2,1 | 1,41E-04 | 767,10  | 263,73 | 766,67  | 766,80  | 1553,47 | 367,63 |
| C1um054G            | um01612 | hypothetical protein                                  | -1.12 | 9.78E-01 | 2,7  | 1,94E-04 | -1,8 | 7,44E-04 | 143,60  | 61,20  | 174,87  | 215,85  | 240,07  | 437,90 |
| W3um256G            | um05785 | - acyl transferase-like protein                       | -1.13 | 9.78E-01 | 8,8  | 4,31E-09 | -3,0 | 1,50E-06 | 1105,00 | 228,77 | 905,83  | 983,45  | 2022,53 | 302,33 |
| W4um256G            | um05787 | hypothetical protein                                  | -1.12 | 9.78E-01 | 6,1  | 3,86E-08 | -2,8 | 7,44E-06 | 1024,45 | 226,17 | 757,87  | 904,50  | 1390,87 | 272,67 |
| C25um256G           | um05783 | - related to UDP-galactose transporter                | -1.22 | 9.78E-01 | 10,0 | 6,65E-07 | -3,6 | 1,30E-04 | 265,15  | 43,90  | 232,50  | 225,95  | 422,10  | 63,53  |
| C2um071G            | um04371 | - conserved hypothetical protein                      | -1.10 | 9.91E-01 | 1,9  | 2,00E-03 | -1,7 | 1,30E-04 | 174,60  | 37,00  | 126,40  | 174,60  | 149,93  | 62,10  |
| C9um144G            | um04056 | - probable SNQ2 - ABC transporter involved in mul     | -1.21 | 9.78E-01 | 2,7  | 3,41E-05 | -2,2 | 2,52E-04 | 279,15  | 134,53 | 335,53  | 341,20  | 370,00  | 148,13 |
| C6um028G            | um04088 | hypothetical protein                                  | -1.09 | 9.91E-01 | 2,0  | 5,05E-04 | -1,5 | 2,71E-02 | 215,90  | 121,87 | 215,30  | 234,40  | 245,73  | 143,93 |
| W2um237G            | um03281 | putative protein                                      | -1.15 | 9.78E-01 | 2,0  | 7,44E-05 | -1,8 | 3,16E-04 | 234,80  | 159,17 | 261,93  | 206,40  | 322,73  | 143,50 |
| C2um138G            | um03612 | - conserved hypothetical protein                      | -1.24 | 9.78E-01 | 2,9  | 4,96E-06 | -2,3 | 1,80E-06 | 146,60  | 146,60 | 146,60  | 146,60  | 146,60  | 146,60 |
| W7um213G            | um03651 | hypothetical protein                                  | -1.23 | 9.78E-01 | 4,5  | 6,33E-06 | -4,7 | 3,66E-06 | 171,45  | 83,37  | 356,40  | 150,10  | 373,30  | 75,27  |
| C15um235G           | um05153 | - related to MNT4 - putative alpha-1,3-mannosyltr     | -1.04 | 9.94E-01 | 4,2  | 4,25E-08 | -3,3 | 2,86E-07 | 600,20  | 294,43 | 1049,20 | 583,85  | 1276,93 | 319,07 |
| C15um046G           | um04368 | - related to endo-1,3(4)-beta-glucanase               | -1.21 | 9.78E-01 | 6,1  | 1,42E-07 | -3,7 | 3,77E-06 | 1020,70 | 354,83 | 1726,70 | 879,95  | 2160,67 | 472,60 |
| W2um256G            | um05152 | - conserved hypothetical protein                      | -1.03 | 9.98E-01 | 3,0  | 1,21E-06 | -2,1 | 3,65E-07 | 126,60  | 67,50  | 126,60  | 126,60  | 126,60  | 126,60 |
| W2um235G            | um05152 | - conserved hypothetical protein                      | -1.16 | 9.78E-01 | 6,6  | 3,26E-07 | -4,5 | 3,15E-06 | 245,75  | 67,17  | 375,70  | 221,35  | 451,17  | 82,70  |
| C9um210G            | um02825 | - conserved hypothetical protein                      | -1.08 | 9.78E-01 | 2,5  | 4,62E-07 | -1,8 | 3,44E-05 | 565,40  | 428,23 | 868,23  | 614,95  | 1086,23 | 484,03 |
| W3um222G            | um00118 | - probable UDP-glucose 6-dehydrogenase                | -1.22 | 9.78E-01 | 3,5  | 2,19E-06 | -2,4 | 6,92E-05 | 631,40  | 351,30 | 907,90  | 537,95  | 1239,50 | 382,07 |
| W7um281G            | um02248 | - related to transition initiation protein SUA5       | -1.03 | 9.98E-01 | 3,2  | 1,45E-04 | -2,8 | 4,46E-04 | 146,40  | 51,23  | 185,67  | 148,35  | 194,23  | 66,53  |
| W2um246G            | um02682 | - related to gamma-actin                              | -1.07 | 9.94E-01 | 2,6  | 9,99E-06 | -1,8 | 7,07E-05 | 166,80  | 115,03 | 166,80  | 174,20  | 244,30  | 121,20 |
| W4um164G            | um04068 | - related to glycylamide ribonucleotide transferm     | -1.03 | 9.98E-01 | 2,2  | 2,02E-05 | -1,7 | 4,75E-04 | 269,05  | 155,90 | 278,23  | 260,30  | 346,33  | 160,83 |
| W2um144G            | um05633 | - conserved hypothetical protein                      | -1.07 | 9.91E-01 | 4,3  | 5,52E-08 | -3,2 | 5,29E-07 | 510,65  | 172,67 | 614,47  | 475,85  | 743,80  | 190,40 |
| C9um158G            | um01755 | putative protein                                      | -1.01 | 9.98E-01 | 2,9  | 1,36E-05 | -2,0 | 1,39E-05 | 343,60  | 168,00 | 439,33  | 345,80  | 484,70  | 148,57 |
| W15um184G           | um04094 | - related to gamma-actin                              | -1.17 | 9.78E-01 | 2,9  | 4,85E-07 | -2,2 | 3,90E-07 | 421,75  | 245,63 | 432,37  | 586,20  | 682,47  | 29,03  |
| W10um201G           | um00896 | - probable KRE6 - glucan synthase subunit             | -1.13 | 9.78E-01 | 3,0  | 2,91E-07 | -2,2 | 7,34E-06 | 375,05  | 145,87 | 363,43  | 333,85  | 446,17  | 161,73 |
| W15um094G           | um00896 | - Kin1 - kinesin motor protein 1                      | -1.01 | 9.98E-01 | 2,6  | 1,96E-06 | -2,1 | 2,12E-05 | 326,90  | 164,87 | 361,43  | 331,35  | 430,13  | 170,73 |
| W16um127G           | um01487 | - conserved hypothetical protein                      | -1.15 | 9.78E-01 | 4,5  | 4,97E-08 | -3,8 | 1,70E-07 | 296,65  | 104,07 | 368,77  | 257,95  | 468,97  | 95,47  |
| W10um184G           | um01808 | hypothetical protein                                  | -1.12 | 9.78E-01 | 2,7  | 1,94E-07 | -1,7 | 1,84E-07 | 177,45  | 89,57  | 149,67  | 149,67  | 230,07  | 81,20  |
| C15um013G           | um03547 | hypothetical protein                                  | -1.06 | 9.91E-01 | 3,2  | 4,25E-08 | -2,8 | 1,64E-07 | 704,60  | 297,37 | 742,40  | 667,05  | 961,43  | 262,60 |
| W10um207G           | um02077 | - related to M-phase inducer phosphatase              | -1.03 | 9.94E-01 | 2,4  | 8,10E-08 | -1,8 | 6,05E-06 | 236,85  | 135,60 | 257,27  | 243,85  | 329,13  | 145,80 |
| W2um195G            | um01851 | - conserved hypothetical protein                      | -1.02 | 9.98E-01 | 3,3  | 3,43E-08 | -2,5 | 4,50E-07 | 1113,40 | 484,27 | 1225,40 | 1089,15 | 1612,00 | 457,27 |
| W3um144G            | um01851 | - conserved hypothetical protein (fragment)           | -1.02 | 9.98E-01 | 3,5  | 4,77E-05 | -2,3 | 3,79E-03 | 171,35  | 67,50  | 126,40  | 126,40  | 126,40  | 126,40 |
| W12um171G           | um00072 | - conserved hypothetical protein                      | -1.01 | 9.99E-01 | 2,0  | 4,77E-05 | -1,8 | 3,47E-04 | 1008,15 | 683,47 | 1333,37 | 1003,20 | 1385,40 | 757,27 |
| C5um162G            | um02127 | hypothetical protein                                  | -1.05 | 9,92E-01 | 2,2  | 1,18E-05 |      |          |         |        |         |         |         |        |

|                      |         |                                                      |       |          |      |          |      |          |         |         |         |         |         |         |
|----------------------|---------|------------------------------------------------------|-------|----------|------|----------|------|----------|---------|---------|---------|---------|---------|---------|
| C70um167G_at         | um10414 | -conserved hypothetical protein                      | -1.10 | 9.78E-01 | 2.0  | 3.11E-05 | -2.2 | 1.15E-05 | 402.15  | 208.37  | 458.13  | 366.20  | 407.83  | 207.77  |
| W65um258G_at         | um40403 | -conserved hypothetical protein                      | -1.05 | 9.92E-01 | 1.9  | 6.18E-05 | -2.0 | 3.07E-05 | 156.70  | 89.93   | 174.80  | 149.40  | 171.30  | 84.73   |
| W110um139G_at        | um16447 | -related to CDC20 - cell division control protein    | -1.16 | 9.78E-01 | 2.3  | 2.42E-06 | -2.5 | 1.47E-06 | 519.50  | 241.93  | 560.60  | 447.70  | 545.50  | 227.70  |
| C45um140G_at         | um33715 | -related to GUS1 - Glutaryl-tRNA synthetase          | -1.03 | 9.97E-01 | 2.6  | 7.25E-06 | -2.1 | 5.89E-07 | 117.50  | 453.27  | 125.00  | 111.20  | 117.60  | 468.03  |
| C100um49G_at         | um00081 | -hypothetical protein                                | -1.05 | 9.94E-01 | 2.1  | 6.06E-05 | -1.9 | 1.95E-04 | 595.95  | 317.43  | 579.53  | 569.40  | 646.13  | 303.13  |
| C75um174G_at         | um02741 | -related to serine/threonine protein kinase COT-1    | -1.12 | 9.78E-01 | 3.2  | 5.08E-07 | -2.7 | 2.88E-06 | 190.70  | 68.60   | 207.90  | 172.50  | 226.10  | 74.50   |
| W50um079G_at         | um32662 | -related to Serpin                                   | 1.08  | 9.78E-01 | 2.1  | 2.08E-06 | -2.3 | 9.88E-07 | 159.80  | 89.47   | 176.33  | 172.50  | 187.00  | 75.87   |
| C90um120G_at         | um10206 | -related to Serine/threonine-protein kinase mph1     | 1.03  | 9.78E-01 | 2.3  | 1.84E-04 | -2.3 | 1.16E-04 | 317.70  | 145.50  | 309.53  | 327.40  | 329.30  | 125.90  |
| W25um145G_at         | um1110  | -conserved hypothetical protein                      | -1.10 | 9.78E-01 | 2.4  | 2.42E-06 | -1.6 | 8.82E-06 | 250.35  | 110.93  | 270.33  | 240.33  | 270.33  | 130.17  |
| W95um117G_at         | um30382 | -conserved hypothetical protein                      | 1.01  | 9.98E-01 | 1.7  | 3.61E-05 | -2.1 | 4.53E-06 | 409.75  | 224.40  | 400.20  | 412.95  | 388.67  | 193.40  |
| W6um022G_at          | um00126 | -conserved hypothetical protein                      | 1.08  | 9.98E-01 | 2.2  | 6.71E-06 | -2.1 | 1.11E-05 | 562.30  | 277.57  | 568.00  | 603.95  | 596.00  | 269.50  |
| W35um151G_at         | um10937 | -conserved hypothetical protein                      | 1.06  | 9.94E-01 | 2.4  | 6.85E-05 | -3.0 | 1.21E-05 | 186.35  | 77.63   | 189.73  | 198.10  | 184.07  | 62.00   |
| W30um133G_at         | um01395 | -related to DNA topoisomerase II                     | 1.02  | 9.98E-01 | 2.0  | 2.84E-05 | -2.2 | 6.07E-04 | 247.70  | 102.83  | 216.23  | 195.80  | 200.17  | 96.57   |
| W155um083G_at        | um12537 | -related to SMC4 - Stable Maintenance of Chromo-     | 1.15  | 9.78E-01 | 1.8  | 1.87E-05 | -2.1 | 4.10E-06 | 228.35  | 121.97  | 227.30  | 263.30  | 227.37  | 117.30  |
| C155um139G_at        | um01322 | -probable VID27 - involved in Vacuole import and     | 1.01  | 9.98E-01 | 2.0  | 1.92E-06 | -1.9 | 4.10E-06 | 426.50  | 195.23  | 399.70  | 429.35  | 393.30  | 206.07  |
| W55um98G_at          | um01144 | -putative protein                                    | 1.04  | 9.98E-01 | 2.4  | 4.99E-05 | -2.9 | 1.34E-05 | 219.10  | 83.37   | 222.97  | 228.15  | 201.83  | 76.57   |
| W40um150G_at         | um09985 | -conserved hypothetical protein                      | 1.20  | 9.78E-01 | 2.0  | 2.82E-04 | -1.9 | 6.12E-04 | 126.85  | 61.27   | 142.23  | 151.40  | 136.37  | 73.03   |
| W6um131G_at**        | um11783 | -related to N-acetylglucosaminyltransferase SPT14    | 1.58  | 9.16E-01 | 6.5  | 3.03E-06 | -5.6 | 8.14E-06 | 53.00   | 8.70    | 66.30   | 84.55   | 62.87   | 11.90   |
| W20um166G_at         | um00411 | -related to metalloproteinase MEP1                   | -1.46 | 9.78E-01 | -1.1 | 7.75E-01 | -4.2 | 4.13E-05 | 15.35   | 14.17   | 48.73   | 10.25   | 13.20   | 11.63   |
| C110um127G_at        | um04884 | -conserved hypothetical protein                      | -1.07 | 9.98E-01 | -2.5 | 1.17E-03 | -3.1 | 2.90E-04 | 63.85   | 247.07  | 604.57  | 59.35   | 95.80   | 198.63  |
| W130um209G_at        | um00275 | -putative protein                                    | -1.17 | 9.78E-01 | 1.0  | 9.03E-01 | -4.7 | 7.16E-06 | 17.10   | 62.70   | 263.77  | 13.95   | 64.60   | 54.23   |
| W15um090G_at         | um09113 | -Glo2 - Glyoxaloxidase 2                             | -1.39 | 9.56E-01 | -1.1 | 7.53E-01 | -2.3 | 4.89E-04 | 31.60   | 64.93   | 107.20  | 44.55   | 62.83   | 45.57   |
| W55um0309            | um00309 | -conserved hypothetical protein                      | 1.09  | 9.91E-01 | 1.5  | 6.92E-03 | -2.2 | 1.34E-04 | 230.90  | 934.97  | 2468.43 | 250.90  | 1455.23 | 1106.33 |
| C11um259G_at         | um10671 | -related to Pectin lyase B precursor                 | -1.03 | 9.98E-01 | 1.5  | 2.76E-02 | -2.1 | 5.10E-04 | 75.80   | 53.03   | 100.97  | 73.80   | 78.53   | 47.07   |
| W75um278G_at         | um02775 | -related to UDP-glucanase                            | -1.17 | 9.78E-01 | 1.5  | 4.42E-03 | -2.2 | 2.82E-05 | 361.15  | 249.27  | 440.27  | 308.80  | 368.07  | 200.27  |
| W80um127G_at         | um04872 | -probable ARG1 - argininosuccinate synthetase        | -1.15 | 9.91E-01 | 2.6  | 2.94E-04 | -3.1 | 1.24E-04 | 2386.95 | 863.90  | 2497.30 | 2144.65 | 2336.03 | 795.53  |
| W80um213G_at         | um03648 | -related to purine nucleotide binding protein        | -1.28 | 9.78E-01 | 1.4  | 7.48E-02 | -2.7 | 2.02E-04 | 271.75  | 126.47  | 268.60  | 214.65  | 184.57  | 97.43   |
| C210um132G_at        | um05156 | -probable Replication factor-A protein 1             | -1.15 | 9.78E-01 | 1.7  | 3.64E-03 | -2.6 | 5.79E-05 | 266.75  | 133.67  | 334.77  | 231.40  | 230.30  | 128.70  |
| C45um043G_at         | um01643 | -probable ATR-binding multidrug cassette transpor    | -1.12 | 9.91E-01 | 4.4  | 3.06E-03 | -1.6 | 9.18E-06 | 1005.40 | 102.63  | 1186.57 | 1044.80 | 504.03  | 117.50  |
| C65um135G_at         | um01655 | -related to lysine family                            | 1.00  | 1.00E+00 | 1.5  | 1.13E-03 | -2.2 | 3.70E-07 | 239.70  | 100.70  | 299.80  | 240.00  | 148.57  | 93.57   |
| C50um148G_at         | um00798 | -probable RAD5 - DNA helicase                        | 1.04  | 9.98E-01 | 1.5  | 3.17E-03 | -2.4 | 2.46E-05 | 247.80  | 138.17  | 279.30  | 258.40  | 215.97  | 117.57  |
| W30um214G_at         | um06443 | -probable TIF6 - translation initiation factor 6 (eL | 1.16  | 9.78E-01 | 1.6  | 3.53E-03 | -2.2 | 7.58E-05 | 814.30  | 377.90  | 835.27  | 956.45  | 593.73  | 375.63  |
| C75um079G_at         | um03264 | -probable xanthine dehydrogenase                     | 1.42  | 9.20E-01 | 2.3  | 3.22E-04 | -2.5 | 2.20E-04 | 204.75  | 201.17  | 478.97  | 281.05  | 458.80  | 196.53  |
| W151um078G_at        | um01024 | -related to DNA repair protein RAD51                 | 1.00  | 1.00E+00 | 1.2  | 2.84E-05 | -1.9 | 4.98E-04 | 121.05  | 62.37   | 121.05  | 149.80  | 130.17  | 106.50  |
| W60um154G_at         | um10329 | -related to Sorting nexin 9                          | 1.36  | 9.78E-01 | 4.0  | 1.98E-04 | -6.0 | 3.01E-05 | 9.05    | 4.03    | 31.27   | 11.50   | 18.90   | 4.50    |
| W35um023G_at         | um10329 | -related to guanine deaminase                        | 1.01  | 9.99E-01 | 1.8  | 1.66E-03 | -2.1 | 5.42E-04 | 192.60  | 177.60  | 362.60  | 193.60  | 326.93  | 172.67  |
| C40um019G_at         | um06399 | -conserved hypothetical protein                      | 1.03  | 9.98E-01 | 2.1  | 2.48E-03 | -3.0 | 2.38E-04 | 184.10  | 128.00  | 378.90  | 189.50  | 278.73  | 123.43  |
| W85um189G_at         | um01772 | -related to ATP-binding oxidoreductase               | -1.41 | 9.98E-01 | 1.2  | 7.55E-04 | -2.0 | 3.50E-04 | 1953.30 | 1017.23 | 2709.87 | 165.85  | 130.93  | 106.50  |
| C78um043G_at         | um02787 | -hypothetical protein                                | 1.15  | 9.91E-01 | 1.3  | 3.17E-01 | -3.8 | 4.64E-04 | 6.95    | 4.80    | 18.80   | 8.20    | 6.87    | 4.10    |
| C40um084G_at         | um06255 | -hypothetical protein                                | 1.17  | 9.91E-01 | -1.0 | 9.25E-01 | -4.8 | 5.91E-04 | 9.10    | 44.57   | 13.70   | 8.70    | 8.70    | 7.07    |
| W61um190G_at         | um00336 | -putative protein                                    | 1.05  | 9.98E-01 | 1.3  | 5.29E-01 | -6.5 | 1.67E-04 | 125.30  | 126.83  | 683.40  | 132.10  | 168.83  | 89.23   |
| UG16-21e9-130e3_RC_2 | um05253 | -related to ATP-binding multidrug cassette transp    | -1.43 | 9.13E-01 | 1.9  | 8.98E-01 | -9.9 | 8.11E-04 | 715.35  | 618.10  | 3572.67 | 564.75  | 136.47  | 391.77  |
| W61um152G_at         | um05271 | -related to Malic acid transport protein             | -1.30 | 9.78E-01 | 1.7  | 7.50E-02 | -4.3 | 2.19E-04 | 226.30  | 106.03  | 411.60  | 174.05  | 186.93  | 88.20   |
| C41um217G_at         | um04500 | -hypothetical protein                                | -1.46 | 9.78E-01 | 1.7  | 1.28E-01 | -9.1 | 4.16E-05 | 1255.40 | 410.93  | 2372.00 | 861.35  | 864.83  | 252.63  |
| W50um85G_at          | um06219 | -related to dna excision repair protein ercc-1       | -1.35 | 9.78E-01 | 1.2  | 3.39E-01 | -2.8 | 2.40E-04 | 139.35  | 144.10  | 239.50  | 103.10  | 176.60  | 85.10   |
| C25um036G_at         | um01172 | -hypothetical protein                                | -1.17 | 9.78E-01 | 1.2  | 2.82E-02 | -2.1 | 2.82E-02 | 6.97    | 6.97    | 6.97    | 6.97    | 6.97    | 6.97    |
| W105um021G_at        | um03114 | -conserved hypothetical protein                      | -1.30 | 8.08E-01 | -2.9 | 2.56E-07 | -1.2 | 1.50E-01 | 496.65  | 512.30  | 488.30  | 381.80  | 177.03  | 422.70  |
| C52um065G_at         | um04145 | -putative protein                                    | -1.47 | 9.37E-01 | -1.6 | 2.52E-02 | -2.5 | 4.85E-04 | 164.85  | 79.20   | 181.53  | 114.35  | 49.97   | 72.63   |
| W125um108G_at        | um01187 | -hypothetical protein                                | -1.06 | 9.91E-01 | -4.3 | 3.43E-08 | -2.2 | 8.69E-06 | 2156.45 | 1361.70 | 2273.60 | 2043.25 | 315.80  | 1033.90 |
| W52um67G_at          | um04712 | -related to programmed cell death protein (calciur   | -1.40 | 9.91E-01 | -1.0 | 1.25E-05 | -1.1 | 2.55E-05 | 140.50  | 120.10  | 174.85  | 140.50  | 150.53  | 57.53   |
| W25um259G_at         | um04712 | -related to N-methyltransferase                      | 1.34  | 8.33E-01 | -2.0 | 3.38E-05 | -1.9 | 2.89E-04 | 341.25  | 299.83  | 197.30  | 164.15  | 147.03  | 367.23  |
| W85um192G_at         | um10053 | -related to carbonic anhydrase                       | 1.08  | 9.89E-01 | -2.4 | 3.08E-06 | 1.2  | 1.26E-01 | 456.95  | 296.87  | 223.23  | 499.85  | 124.23  | 287.97  |
| W20um231G_at         | um06152 | -hypothetical protein                                | -1.12 | 9.78E-01 | -2.4 | 1.83E-05 | -1.0 | 8.54E-01 | 358.75  | 321.37  | 246.23  | 320.90  | 134.90  | 231.73  |
| W55um052G_at         | um01522 | -Adri - Protein kinase A, catalytic subunit; requir  | -1.13 | 9.91E-01 | -2.4 | 3.08E-03 | -1.0 | 4.15E-04 | 410.95  | 511.54E | 428.67  | 398.95  | 82.13   | 1395.03 |
| W130um013G_at        | um03523 | -probable aldehyde dehydrogenase                     | 1.19  | 9.91E-01 | -4.0 | 3.79E-04 | -1.1 | 8.20E-01 | 49.03   | 40.37   | 35.95   | 25.95   | 11.53   | 44.93   |
| C64um147G_at         | um00757 | -conserved hypothetical protein                      | -1.16 | 9.78E-01 | -2.3 | 2.34E-04 | 1.2  | 3.99E-01 | 193.30  | 498.20  | 167.95  | 167.95  | 217.50  | 473.00  |
| C61um123G_at         | um05442 | -conserved hypothetical protein                      | 1.08  | 9.94E-01 | -2.1 | 9.90E-04 | -1.0 | 9.49E-01 | 54.20   | 105.53  | 90.00   | 58.35   | 50.20   | 90.83   |
| W120um027G_at        | um03924 | -Rep1 - repellent protein 1 precursor                | -1.01 | 9.98E-01 | -3.6 | 5.55E-02 | -2.0 | 4.49E-02 | 26.70   | 183.47  | 182.20  | 28.90   | 47.77   | 90.10   |
| W10um198G_at         | um01184 | -related to phenol 2-monooxygenase                   | 1.04  | 9.98E-01 | -4.1 | 7.36E-04 | -1.4 | 7.36E-04 | 1.47    | 1.47    | 1.47    | 1.47    | 1.47    | 61.90   |
| W120um099G_at        | um05898 | -conserved hypothetical protein                      | -1.14 | 9.78E-01 | -2.1 | 2.98E-04 | -1.2 | 2.06E-01 | 147.95  | 231.20  | 242.90  | 129.90  | 108.27  | 196.20  |
| W130um021G_at        | um10636 | -conserved hypothetical protein                      | -1.52 | 8.43E-01 | -3.1 | 4.36E-05 | -1.6 | 1.74E-02 | 125.65  | 583.60  | 899.13  | 83.45   | 187.70  | 549.90  |
| C10um163G_at         | um06095 | -putative exochitinase                               | -2.01 | 7.94E-01 | -4.0 | 9.50E-05 | -1.5 | 1.34E-01 | 51.85   | 154.40  | 164.27  | 26.25   | 40.53   | 111.20  |
| W20um187G_at         | um01253 | -related to Adose - epimerase precursor              | -1.10 | 9.78E-01 | -1.7 | 7.55E-04 | -2.0 | 3.50E-04 | 1037.35 | 1027.23 | 1909.87 | 165.85  | 106.50  | 937.50  |
| C65um167G_at         | um04247 | -related to Cholinesterase precursor                 | -1.22 | 9.78E-01 | -4.8 | 2.56E-05 | -2.1 | 6.74E-03 | 16.95   | 150.07  | 178.27  | 14.50   | 30.67   | 82.27   |
| C25um119G_at         | um10866 | -related to canicular multispecific organic anion .  | 1.23  | 9.91E-01 | -3.4 | 7.71E-04 | -1.1 | 8.73E-01 | 38.95   | 215.20  | 206.93  | 48.20   | 64.17   | 180.60  |
| C15um143G_at         | um04883 | -conserved hypothetical protein                      | 1.24  | 9.98E-01 | -2.2 | 2.51E-04 | -1.0 | 9.34E-01 | 57.65   | 147.90  | 141.47  | 72.30   | 66.73   |         |

|                     |         |                                                      |       |          |       |          |     |          |         |            |         |            |         |            |
|---------------------|---------|------------------------------------------------------|-------|----------|-------|----------|-----|----------|---------|------------|---------|------------|---------|------------|
| W50um117G_at        | um10373 | - probable RIB4 - 6,7-dimethyl-8-ribitylmazine sy    | -1.08 | 9.91E-01 | -2.4  | 3,22E-05 | 2.6 | 2,94E-03 | 1088.20 | 2054.70    | 1295.73 | 1019.50    | 872.80  | 2079.47    |
| W145um054G_at       | um06045 | - hypothetical protein                               | -1.32 | 9,08E-01 | -2.5  | 1,83E-05 | 1.7 | 1,43E-03 | 129.95  | 228.80     | 128.70  | 92.80      | 90.50   | 219.57     |
| C85um106G_at        | um10104 | - conserved hypothetical protein                     | -1.29 | 7,03E-01 | -2.2  | 9,30E-07 | 1.5 | 1,90E-04 | 203.90  | 373.40     | 237.70  | 157.85     | 170.53  | 366.90     |
| C100um29G_at        | um10105 | - conserved hypothetical protein                     | -1.07 | 9,91E-01 | -2.1  | 1,47E-06 | 2.1 | 1,47E-06 | 215.70  | 147.67E-06 | 215.70  | 147.67E-06 | 215.70  | 147.67E-06 |
| C60um007G_at        | um05347 | - conserved hypothetical protein                     | -1.28 | 9,78E-01 | -4.1  | 4,60E-05 | 2.8 | 9,70E-04 | 255.05  | 589.33     | 232.67  | 214.60     | 128.93  | 658.57     |
| C60um056G_at        | um01878 | - conserved hypothetical protein                     | -1.31 | 9,78E-01 | -2.8  | 3,28E-04 | 2.1 | 4,58E-03 | 170.75  | 331.77     | 132.67  | 132.85     | 122.13  | 342.90     |
| W95um30G_at         | um01692 | - probable alpha-glucosidase (maltase)               | -1.31 | 9,61E-01 | -3.5  | 3,29E-06 | 1.9 | 7,90E-04 | 97.65   | 235.23     | 114.80  | 76.15      | 66.00   | 223.63     |
| C45um122G_at        | um01692 | - probable CHA1 - L-serine/L-threonine deaminase     | -1.05 | 9,91E-01 | -2.8  | 3,72E-05 | 1.8 | 2,86E-04 | 74.75   | 156.47     | 80.43   | 71.20      | 55.43   | 144.97     |
| W10um13G_at         | um01692 | - conserved hypothetical protein                     | -1.26 | 9,00E+00 | -3.0  | 1,00E-04 | 2.0 | 1,85E-03 | 94.64   | 187.83     | 63.07   | 101.80     | 66.10   | 461.73     |
| W25um055G_at        | um03971 | - related to E.coli thermoresistant glucokinase      | -1.11 | 9,91E-01 | -2.9  | 2,57E-04 | 2.3 | 2,04E-03 | 188.90  | 520.83     | 230.53  | 171.20     | 184.07  | 523.10     |
| C65um250G_at        | um03049 | - related to neutral amino acid permease             | 1.21  | 9,91E-01 | -6.9  | 4,56E-06 | 7.9 | 3,38E-06 | 3.30    | 56.30      | 4.47    | 4.20       | 8.00    | 42.10      |
| UG21-15g21-10e12_RC | um00583 | - conserved hypothetical protein                     | -1.01 | 9,99E-01 | -12.8 | 5,11E-07 | 7.1 | 6,86E-06 | 94.30   | 1670.23    | 177.20  | 95.50      | 131.50  | 1273.97    |
| W51um284G_at        | um01997 | - related to D12 - tRNA-specific adenosine deamin    | -1.02 | 9,98E-01 | -4.0  | 2,61E-07 | 1.9 | 4,64E-04 | 81.90   | 309.20     | 175.03  | 80.00      | 37.60   | 32.80      |
| CLUSTER62_RC_at     | um03620 | - related to Regulatory protein alcR                 | 1.03  | 9,98E-01 | -2.9  | 1,98E-05 | 3.3 | 1,07E-05 | 104.75  | 906.47     | 253.97  | 108.10     | 308.70  | 854.90     |
| C65um081G_at        | um03221 | - conserved hypothetical protein                     | -1.07 | 9,91E-01 | -1.9  | 1,01E-05 | 2.1 | 4,10E-06 | 287.85  | 695.07     | 317.13  | 270.20     | 365.60  | 669.50     |
| C65um074G_at        | um10254 | - conserved hypothetical protein                     | 1.13  | 9,78E-01 | -3.0  | 3,44E-06 | 3.5 | 1,53E-06 | 254.65  | 1013.70    | 390.77  | 285.90     | 331.17  | 1389.83    |
| C70um192G_at        | um01097 | - related to D12 - tRNA-specific adenosine deamin    | -1.02 | 9,98E-01 | -4.0  | 2,61E-07 | 1.9 | 4,64E-04 | 81.90   | 309.20     | 175.03  | 80.00      | 37.60   | 32.80      |
| W55um110G_at        | um10467 | - related to RAD16 - nucleotide excision repair prot | -1.15 | 9,78E-01 | -2.0  | 2,99E-06 | 1.4 | 1,82E-03 | 198.15  | 373.57     | 260.30  | 173.05     | 183.27  | 361.00     |
| W25um285G_at        | um11434 | - hypothetical protein                               | -1.17 | 9,91E-01 | -3.7  | 2,81E-04 | 1.9 | 2,74E-02 | 22.05   | 87.80      | 44.40   | 20.00      | 23.77   | 87.03      |
| C100um229G_at       | um10268 | - putative protein                                   | -1.05 | 9,91E-01 | -2.3  | 6,19E-06 | 1.6 | 7,27E-04 | 418.70  | 962.83     | 600.13  | 395.70     | 421.83  | 962.93     |
| C20um146G_at        | um05961 | - probable alpha-methylacyl-CoA racemase             | -1.37 | 9,78E-01 | -4.1  | 5,21E-05 | 2.3 | 2,97E-03 | 41.05   | 251.43     | 107.23  | 59.20      | 60.73   | 180.00     |
| C160um019G_at       | um11241 | - related to aldehyde dehydrogenase [NAD(P)]         | 1.27  | 9,92E-01 | -2.2  | 8,44E-07 | 1.7 | 4,31E-05 | 174.35  | 461.83     | 272.43  | 222.35     | 212.97  | 451.80     |
| W35um146G_at        | um10864 | - related to GNA1 - essential acetyltransferase      | 1.02  | 9,98E-01 | -5.8  | 8,05E-07 | 3.5 | 2,12E-05 | 15.00   | 197.63     | 74.30   | 15.40      | 33.53   | 256.67     |
| C9um144G_at         | um04057 | - related to dihydrofoloyl reductase                 | -1.18 | 9,98E-01 | -2.2  | 1,02E-04 | 2.0 | 4,22E-04 | 493.60  | 1119.50    | 613.80  | 433.50     | 496.80  | 1224.43    |
| W40um248G_at        | um10304 | - conserved hypothetical protein                     | -1.05 | 9,91E-01 | -8.1  | 1,67E-09 | 2.6 | 9,30E-07 | 136.25  | 164.63     | 70.17   | 143.80     | 202.33  | 1788.87    |
| C85um220G_at        | um10769 | - probable potassium channel beta subunit protein    | -1.47 | 9,78E-01 | -4.3  | 5,45E-05 | 1.9 | 1,63E-02 | 400.35  | 2137.27    | 1124.77 | 314.25     | 498.37  | 2180.17    |
| W21um227G_at***     | um11662 | - related to ECM4 - involved in cell wall biogenesis | -1.08 | 9,91E-01 | -2.7  | 1,05E-06 | 2.1 | 1,77E-05 | 457.85  | 1728.20    | 936.73  | 425.45     | 649.40  | 1926.70    |
| C60um177G_at        | um06495 | - putative protein                                   | 1.06  | 9,91E-01 | -2.3  | 8,45E-06 | 2.0 | 6,46E-05 | 159.90  | 427.77     | 251.20  | 169.25     | 186.20  | 487.57     |
| W90um13G_at         | um01392 | - hypothetical protein                               | -1.11 | 9,98E-01 | -5.6  | 1,41E-05 | 3.2 | 1,54E-04 | 107.15  | 307.15     | 131.85  | 50.27      | 18.27   | 97.53      |
| W45um10G_at         | um01270 | - probable aminopeptidase P, cytoplasmic             | 1.01  | 9,99E-01 | -2.9  | 4,97E-08 | 2.3 | 6,72E-07 | 171.00  | 592.23     | 271.37  | 171.90     | 207.63  | 612.90     |
| W85um30G_at         | um01090 | - probable POT1 - acetyl-CoA C-acyltransferase, pe   | -1.07 | 9,94E-01 | -4.0  | 2,64E-06 | 3.5 | 8,04E-06 | 179.05  | 1760.80    | 562.70  | 167.50     | 446.17  | 1935.67    |
| C100um112G_at       | um04641 | - probable PRCl1 - carboxypeptidase y, serine-type   | -1.23 | 9,78E-01 | -4.3  | 7,46E-06 | 2.4 | 6,62E-04 | 394.65  | 1724.40    | 770.93  | 339.25     | 405.80  | 1805.70    |
| C55um066G_at        | um04187 | - conserved hypothetical protein                     | -1.72 | 9,36E-01 | -8.9  | 4,25E-06 | 3.0 | 1,19E-03 | 36.45   | 387.47     | 131.57  | 22.10      | 45.47   | 399.10     |
| W75um139G_at        | um01217 | - conserved hypothetical protein                     | -1.26 | 9,88E-01 | -4.0  | 4,28E-07 | 1.6 | 1,82E-07 | 169.35  | 1643.07    | 294.63  | 120.80     | 168.80  | 1684.80    |
| W60um060G_at        | um02118 | - putative protein                                   | 1.76  | 8,41E-01 | -3.2  | 3,16E-04 | 2.1 | 8,97E-03 | 165.80  | 87.43      | 7.75    | 57.43      | 184.10  | 184.10     |
| W30um057G_at        | um06082 | - related to NIPSNAP protein                         | -1.20 | 9,78E-01 | -2.7  | 2,68E-05 | 1.9 | 7,90E-04 | 332.35  | 1453.77    | 757.90  | 284.75     | 548.80  | 1446.93    |
| W175um086G_at       | um01658 | - related to glutaminase A                           | 1.03  | 9,98E-01 | -4.9  | 6,28E-05 | 2.4 | 5,55E-03 | 37.85   | 587.87     | 261.47  | 38.90      | 122.63  | 587.40     |
| C25um178G_at        | um01994 | - hypothetical protein                               | -1.02 | 9,98E-01 | -2.4  | 7,07E-04 | 3.8 | 1,45E-04 | 548.35  | 1145.60    | 478.57  | 469.17     | 498.17  | 1248.13    |
| C42um003G_at        | um13778 | - hypothetical protein                               | -1.08 | 9,91E-01 | -2.4  | 2,89E-05 | 2.4 | 3,74E-05 | 71.65   | 414.27     | 197.30  | 67.65      | 170.33  | 474.70     |
| C35um117G_at        | um03069 | - probable acetyl-CoA synthetase                     | 1.34  | 7,03E-01 | -2.0  | 8,54E-06 | 1.9 | 1,84E-05 | 1308.35 | 4660.73    | 2489.67 | 1780.60    | 2300.47 | 4844.60    |
| W20um740G_at        | um03169 | - probable CAR2 - ornithine aminotransferase         | 2.19  | 7,58E-01 | -2.7  | 1,95E-03 | 5.1 | 6,64E-05 | 58.40   | 2508.17    | 552.63  | 145.60     | 929.27  | 2748.40    |
| C40um209G_at        | um02005 | - probable benzoyl-CoA:nonoxoacylase cytochrome      | 1.55  | 9,99E-01 | -4.2  | 2,22E-04 | 3.6 | 4,31E-04 | 82.25   | 322.67     | 98.40   | 89.40      | 399.27  | 320.33     |
| W75um036G_at        | um02763 | - conserved hypothetical protein                     | -1.01 | 9,98E-01 | -1.9  | 4,40E-05 | 2.6 | 2,69E-06 | 1207.20 | 4776.87    | 2122.13 | 1193.10    | 2480.90 | 5457.80    |
| W10um227G_at        | um10066 | - related to ACYL-CoA DEHYDROGENASE, LONG-Cl         | 1.48  | 9,94E-01 | -2.4  | 7,04E-04 | 3.6 | 9,99E-04 | 172.75  | 1481.30    | 625.20  | 284.15     | 618.40  | 1655.60    |
| C50um22G_C145um049G | um01426 | - related to membrane protein, peroxisomal           | -1.07 | 9,88E-01 | -2.7  | 2,37E-07 | 3.1 | 7,97E-08 | 391.40  | 1880.50    | 726.33  | 366.55     | 701.43  | 2242.37    |
| W60um103G_at        | um01994 | - probable ALCOHOL DEHYDROGENASE 1 - ADH1            | -1.12 | 9,78E-01 | -4.7  | 6,30E-09 | 2.9 | 2,54E-07 | 629.97  | 1204.93    | 623.90  | 113.93     | 150.27  | 618.13     |
| C95um165G_at        | um04028 | - conserved hypothetical protein                     | -1.18 | 9,91E-01 | -4.7  | 6,56E-05 | 3.2 | 7,33E-04 | 34.50   | 580.10     | 192.00  | 31.40      | 122.63  | 610.70     |
| W50um257G_at        | um05757 | - conserved hypothetical protein                     | -1.12 | 9,78E-01 | -2.2  | 2,98E-05 | 2.7 | 5,93E-06 | 221.30  | 695.43     | 305.27  | 196.00     | 303.37  | 818.70     |
| W30um268G_at        | um04077 | - related to 4-oxo-cumarate-CoA ligase 1             | -1.18 | 9,98E-01 | -2.1  | 3,25E-05 | 3.0 | 1,37E-06 | 106.85  | 687.20     | 294.27  | 126.60     | 327.37  | 894.87     |
| W75um209G_at        | um01270 | - related to 4-oxo-cumarate-CoA ligase 1 (fragment)  | -1.12 | 9,98E-01 | -2.1  | 3,25E-05 | 3.0 | 1,37E-06 | 106.85  | 687.20     | 294.27  | 126.60     | 327.37  | 894.87     |
| C110um281G_at       | um00479 | - probable alcohol dehydrogenase 1                   | -1.01 | 9,98E-01 | -1.9  | 1,37E-05 | 2.3 | 1,99E-06 | 115.45  | 457.73     | 243.67  | 114.05     | 240.90  | 561.70     |
| C75um003G_at        | um01966 | - related to Acyl-coenzyme A oxidase 1, peroxisom    | 1.23  | 9,78E-01 | -3.6  | 6,91E-07 | 3.5 | 1,22E-06 | 7.30    | 594.30     | 199.53  | 9.25       | 165.03  | 693.93     |
| W45um119G_at        | um06400 | - conserved hypothetical protein                     | -1.07 | 9,91E-01 | -3.5  | 1,73E-07 | 7.6 | 4,82E-09 | 175.25  | 310.37     | 497.30  | 162.90     | 878.77  | 3771.50    |
| C65um098G_at        | um01392 | - conserved hypothetical protein                     | -1.11 | 9,98E-01 | -5.6  | 1,41E-05 | 3.2 | 1,54E-04 | 107.15  | 307.15     | 131.85  | 50.27      | 18.27   | 97.53      |
| C155um005G_at       | um11191 | - related to phenylacetyl-CoA ligase                 | 1.02  | 9,98E-01 | -3.9  | 3,98E-06 | 5.4 | 7,88E-07 | 50.65   | 831.43     | 486.30  | 53.35      | 211.93  | 1024.33    |
| C95um018G_at        | um11303 | - hypothetical protein                               | -1.22 | 9,78E-01 | -3.2  | 1,57E-06 | 3.4 | 1,42E-06 | 209.15  | 1404.83    | 869.60  | 174.75     | 441.63  | 1611.63    |
| C145um093G_at       | um05089 | - related to GL04 - glyoxalase II (hydroxyacylgluta  | 1.20  | 9,56E-01 | -1.6  | 2,48E-04 | 2.2 | 8,84E-06 | 279.05  | 658.90     | 353.40  | 337.95     | 400.27  | 767.47     |
| W45um046G_at        | um04046 | - conserved hypothetical protein                     | -1.07 | 9,91E-01 | -2.0  | 2,69E-04 | 3.3 | 4,44E-07 | 74.20   | 529.27     | 220.07  | 69.10      | 264.07  | 726.23     |
| W75um139G_at        | um02223 | - related to glutaryl-CoA dehydrogenase              | 1.27  | 9,91E-01 | -1.7  | 1,27E-07 | 3.7 | 1,45E-04 | 195.45  | 64.40      | 40.90   | 399.40     | 376.70  | 1276.23    |
| W155um281G_at       | um02223 | - related to acid phosphatase                        | -1.13 | 9,91E-01 | -4.1  | 8,79E-06 | 6.1 | 1,49E-06 | 4.95    | 27.87      | 5.17    | 4.40       | 6.13    | 36.60      |
| W35um041G_at        | um05390 | - Np15 - related to peroxisomal membrane protein     | 1.07  | 9,91E-01 | -2.8  | 7,46E-06 | 4.3 | 4,64E-07 | 66.25   | 234.03     | 63.57   | 70.50      | 82.83   | 279.43     |
| W155um003G_at       | um01945 | - probable SUC2 - invertase (sucrose hydrolyzing en  | 1.04  | 9,98E-01 | -7.0  | 1,51E-07 | 4.8 | 1,56E-06 | 51.20   | 246.27     | 49.03   | 53.25      | 34.17   | 233.70     |
| W125um129G_at***    | um01945 | - probable OAC1 - similar to cytochrome b5           | -1.05 | 9,94E-01 | -2.4  | 7,47E-07 | 3.7 | 1,45E-06 | 145.60  | 478.57     | 243.67  | 114.05     | 240.90  | 561.70     |
| W71um089G_at        | um10819 | - related to aminopeptidase c                        | 1.14  | 9,99E-01 | -3.3  | 7,03E-09 | 3.7 | 4,47E-09 | 243.35  | 153.57     | 277.65  | 107.13     | 571.03  | 571.03     |
| C45um117G_at        | um03071 | - related to acetyl-CoA-hydrotase                    | 1.07  | 9,94E-01 | -8.0  | 1,22E-07 | 6.2 | 9,47E-07 | 260.23  | 2402.67    | 472.27  | 653.30     | 443.43  | 2613.03    |
|                     |         |                                                      |       |          |       |          |     |          |         |            |         |            |         |            |

|                 |          |                                                      |       |          |       |          |      |          |         |         |         |         |         |         |
|-----------------|----------|------------------------------------------------------|-------|----------|-------|----------|------|----------|---------|---------|---------|---------|---------|---------|
| C60um171G_at    | um00059  | - related to 3-mercapopyruvate sulfurtransferase     | 1,05  | 9,98E-01 | -3,0  | 1,76E-05 | 2,4  | 1,37E-04 | 238,30  | 779,20  | 355,50  | 256,50  | 259,33  | 848,23  |
| C135um003G_at   | um01950  | - conserved hypothetical protein                     | 1,20  | 9,91E-01 | -10,6 | 3,29E-06 | 6,3  | 3,66E-05 | 16,85   | 386,50  | 70,53   | 20,25   | 34,60   | 413,87  |
| C140um209G_at   | um00029  | - probable myo-inositol oxygenase                    | -1,99 | 9,37E-01 | -11,8 | 1,19E-05 | 5,0  | 4,86E-04 | 30,85   | 1601,40 | 356,47  | 15,65   | 139,83  | 1729,40 |
| C55um022G_at    | um01123  | - related to L-lactate dehydrogenase (cytochrome I   | -1,49 | 9,78E-01 | -5,8  | 1,30E-04 | 4,4  | 6,50E-04 | 62,05   | 119,00  | 290,30  | 101,75  | 195,13  | 1230,30 |
| C85um074G_at*** | um10251  | - conserved hypothetical protein                     | 1,12  | 9,89E-01 | -2,9  | 1,01E-05 | 3,4  | 4,01E-06 | 58,45   | 290,63  | 91,47   | 65,25   | 97,87   | 314,50  |
| C95um281G_at    | um02236  | - putative protein                                   | 1,09  | 9,94E-01 | -5,3  | 4,57E-06 | 4,2  | 2,16E-05 | 8,30    | 197,83  | 47,93   | 9,40    | 35,70   | 207,07  |
| W35um047G_at    | um03596  | - probable PEX7 - peroxisomal import protein - per   | -1,12 | 9,78E-01 | -2,3  | 3,40E-05 | 2,2  | 7,63E-05 | 128,60  | 299,43  | 151,63  | 114,40  | 128,60  | 329,90  |
| C200um003G_at   | um10454  | - related to 4-coumarate-CoA ligase                  | -1,47 | 9,78E-01 | -11,0 | 4,63E-07 | 5,3  | 1,44E-05 | 233,30  | 1017,33 | 229,20  | 162,65  | 89,67   | 1192,33 |
| C40um137G_at    | um02610  | - conserved hypothetical protein                     | 1,02  | 9,98E-01 | -6,9  | 3,72E-06 | 7,6  | 1,60E-04 | 78,20   | 400,80  | 63,13   | 81,25   | 482,70  | 971,80  |
| W100um146G_at   | um05936  | - conserved hypothetical protein                     | -1,67 | 9,78E-01 | -6,6  | 4,98E-05 | 6,6  | 6,76E-05 | 88,40   | 609,47  | 114,47  | 56,85   | 91,07   | 769,87  |
| C40um228G_at    | um01923  | - conserved hypothetical protein                     | -1,10 | 9,91E-01 | -3,1  | 8,36E-05 | 4,2  | 1,32E-05 | 49,95   | 240,43  | 66,80   | 45,15   | 75,40   | 294,63  |
| C206um003G_at   | um01935  | - probable methylglutaryl-CoA hydratase, mitoch      | 1,03  | 9,98E-01 | -5,0  | 1,92E-06 | 4,5  | 4,26E-06 | 43,25   | 270,13  | 65,23   | 45,30   | 52,43   | 305,27  |
| C25um217G_at    | um04504  | - related to CyB2 - lactate dehydrogenase cytochr    | -1,08 | 9,78E-01 | -5,0  | 1,23E-06 | 5,7  | 8,81E-07 | 82,75   | 476,77  | 109,23  | 97,45   | 293,50  | 592,63  |
| W120um144G_at   | um04063  | - related to soluble epoxide hydrolase               | 1,23  | 9,98E-01 | -4,8  | 9,43E-06 | 5,8  | 4,41E-06 | 89,65   | 555,80  | 113,77  | 111,45  | 111,30  | 681,80  |
| W45um208G_at    | um10088  | - related to Acetoacetyl-CoA synthetase              | -1,07 | 9,98E-01 | -12,5 | 2,07E-06 | 21,5 | 5,29E-07 | 34,50   | 454,33  | 26,07   | 33,00   | 33,47   | 593,07  |
| W160um171G_at   | um10996  | - conserved hypothetical protein                     | 1,03  | 9,98E-01 | -8,8  | 1,98E-05 | 10,2 | 1,52E-05 | 34,10   | 411,60  | 52,90   | 33,90   | 46,97   | 546,33  |
| W110um229G_at   | um01907  | - conserved hypothetical protein                     | -1,00 | 1,00E+00 | -7,4  | 6,36E-07 | 11,4 | 1,60E-07 | 41,15   | 675,93  | 82,90   | 41,10   | 85,57   | 971,80  |
| W30um126G_at    | um02208  | - probable acyl-CoA oxidase                          | -1,20 | 9,78E-01 | -6,1  | 5,58E-07 | 4,7  | 3,19E-06 | 411,45  | 2162,97 | 541,57  | 346,60  | 355,77  | 2503,17 |
| W62um108G_at    | um01171  | - related to 4-coumarate-CoA ligase                  | -1,07 | 9,91E-01 | -7,4  | 5,96E-08 | 7,7  | 7,73E-08 | 114,00  | 699,83  | 106,00  | 107,75  | 91,87   | 832,63  |
| W25um229G_at    | um01892  | - probable isocitrate lyase                          | -1,04 | 9,98E-01 | -5,5  | 4,01E-08 | 7,0  | 1,71E-08 | 232,40  | 1209,67 | 201,03  | 222,90  | 214,87  | 1423,67 |
| W40um112G_at    | um01466  | - related to enoyl-CoA hydratase                     | -1,12 | 9,91E-01 | -12,1 | 5,45E-08 | 11,2 | 9,77E-08 | 101,55  | 1102,30 | 113,43  | 92,35   | 89,70   | 1296,23 |
| W100um130G_at   | um03548  | - related to endo-polygalacturonase 6                | -1,16 | 9,78E-01 | -5,5  | 1,21E-06 | 5,3  | 2,19E-06 | 192,60  | 890,07  | 186,97  | 166,25  | 160,13  | 989,37  |
| W100um281G_at   | um02235  | - related to AMP-binding protein                     | 1,08  | 9,91E-01 | -20,9 | 4,78E-09 | 18,7 | 7,18E-09 | 36,35   | 1460,20 | 91,90   | 39,25   | 68,00   | 1746,10 |
| C69um189G_at    | um01164  | - conserved hypothetical protein                     | -1,00 | 1,00E+00 | -3,5  | 2,33E-06 | 4,1  | 1,27E-06 | 203,55  | 891,13  | 240,90  | 199,40  | 252,00  | 986,27  |
| C55um049G_at    | um00092  | - related to levodione reductase                     | -1,02 | 9,98E-01 | -3,2  | 7,34E-07 | 5,2  | 5,28E-08 | 327,60  | 1184,60 | 282,77  | 322,25  | 364,13  | 1482,80 |
| W110um101G_at   | um01257  | - related to peroxisomal ATP carrier                 | 1,13  | 9,78E-01 | -3,6  | 2,70E-06 | 7,0  | 8,64E-08 | 155,35  | 993,50  | 169,87  | 176,65  | 272,40  | 1208,47 |
| W35um081G_at    | um03228  | - related to 4-coumarate-CoA ligase 1                | -1,50 | 9,10E-01 | -4,9  | 4,03E-06 | 8,8  | 3,72E-07 | 37,85   | 318,70  | 49,47   | 25,10   | 63,10   | 438,47  |
| W70um081G_at    | um03220  | - conserved hypothetical protein                     | -1,01 | 9,98E-01 | -2,9  | 3,43E-06 | 4,9  | 1,44E-07 | 171,05  | 908,20  | 233,33  | 169,75  | 309,27  | 1148,13 |
| W35um066G_at    | um01122  | - probable PEX1 - peroxisomal assembly protein - I   | -1,05 | 9,98E-01 | -2,4  | 7,15E-05 | 6,5  | 7,50E-05 | 69,75   | 351,50  | 109,20  | 71,50   | 90,80   | 179,07  |
| W85um188G_at    | um01091  | - related to Long-chain-fatty-acyl-CoA ligase        | 1,17  | 9,91E-01 | -4,1  | 3,15E-05 | 3,4  | 1,45E-05 | 34,20   | 168,27  | 39,90   | 39,70   | 40,00   | 169,13  |
| C31um203G_at    | um04982  | - probable LEU5 - mitochondrial coenzyme A transp    | 1,12  | 9,91E-01 | -3,3  | 5,01E-05 | 3,7  | 3,18E-05 | 110,05  | 442,27  | 132,53  | 124,90  | 130,93  | 510,27  |
| W70um39G_at     | um01149  | - Glo3 - Glyoxaloxidase 3                            | 1,23  | 9,78E-01 | -2,9  | 3,09E-06 | 1,8  | 5,39E-04 | 40,00   | 288,80  | 178,80  | 54,10   | 99,87   | 316,33  |
| W35um190G_at    | um01034  | - probable peroxisomal acyl-coenzyme A thioester     | 1,32  | 9,20E-01 | -2,1  | 1,15E-04 | 2,2  | 1,03E-04 | 105,65  | 772,27  | 445,33  | 140,45  | 364,77  | 981,33  |
| W45um228G_at    | um01710  | - conserved hypothetical protein                     | 1,02  | 9,94E-01 | -6,0  | 4,44E-06 | 1,6  | 9,78E-04 | 88,00   | 408,23  | 65,00   | 63,60   | 118,33  | 592,63  |
| W40um035G_at    | um011207 | - related to PNP1 - purine-nucleoside phosphoryl     | -1,08 | 9,91E-01 | -2,5  | 1,14E-05 | 2,2  | 4,35E-05 | 163,10  | 804,60  | 358,03  | 321,43  | 799,63  | 1327,43 |
| W80um225G_at    | um02142  | - related to muconate cycloisomerase                 | -1,13 | 9,88E-01 | -2,1  | 3,68E-04 | 1,8  | 2,47E-03 | 112,05  | 370,50  | 208,37  | 100,10  | 171,47  | 382,60  |
| C29um022G_at    | um01116  | - related to nicotinamide mononucleotide permeas     | -1,23 | 9,88E-01 | -2,5  | 8,67E-05 | 1,7  | 4,69E-03 | 49,65   | 258,87  | 137,50  | 38,95   | 102,67  | 238,87  |
| C165um119G_at   | um01310  | - probable D-carbamoyl-L-amino acid hydrolase        | 1,06  | 9,91E-01 | -1,5  | 1,23E-05 | 1,6  | 9,40E-03 | 63,05   | 359,30  | 189,67  | 65,60   | 69,13   | 426,33  |
| C5um198G_at     | um06344  | - probable 2-methylcitrate dehydratase               | -1,01 | 1,00E+00 | -1,5  | 1,92E-02 | 2,0  | 7,65E-04 | 1855,45 | 3899,50 | 2185,50 | 1929,55 | 2602,03 | 4368,77 |
| W155um054G_at   | um01151  | - related to Probable 26S proteasome non-ATPase      | -1,31 | 8,94E-01 | -1,4  | 1,11E-02 | 2,2  | 6,28E-05 | 183,10  | 357,13  | 191,37  | 140,95  | 246,73  | 417,20  |
| W60um49G_at     | um01021  | - related to uracil-uridine phosphoryltransferase    | 1,05  | 9,91E-01 | -1,4  | 1,12E-02 | 2,0  | 3,65E-05 | 177,90  | 334,53  | 197,37  | 188,50  | 246,20  | 401,17  |
| W5um153G_at     | um01267  | - probable phosphoenolpyruvate carboxylase           | 1,10  | 9,91E-01 | -1,1  | 1,11E-04 | 3,0  | 2,54E-04 | 329,35  | 1108,67 | 326,43  | 363,45  | 606,83  | 1301,17 |
| W245um074G_at   | um01783  | - related to Inosine uridine preferring nucleoside h | 1,15  | 9,78E-01 | -1,5  | 5,94E-03 | 2,2  | 5,58E-05 | 185,60  | 411,23  | 197,10  | 212,75  | 279,97  | 434,37  |
| W50um079G_at    | um01958  | - related to MLS1 - malate synthase 1                | 1,28  | 9,56E-01 | -1,5  | 1,09E-02 | 3,2  | 3,26E-06 | 918,80  | 2771,87 | 925,00  | 1205,35 | 1899,57 | 2992,47 |
| C30um080G_at    | um03246  | - related to versicolurin B synthase                 | -1,03 | 9,98E-01 | -2,7  | 3,31E-04 | 2,0  | 4,82E-03 | 286,35  | 1526,33 | 904,47  | 279,30  | 579,60  | 1840,93 |
| W143um119G_at   | um01046  | - conserved hypothetical protein                     | 1,04  | 9,98E-01 | -2,7  | 3,31E-04 | 2,0  | 4,82E-03 | 286,35  | 1526,33 | 904,47  | 279,30  | 579,60  | 1840,93 |
| W102um257G_at   | um11582  | - conserved hypothetical protein                     | 1,13  | 9,91E-01 | -6,4  | 2,23E-05 | 2,7  | 3,22E-03 | 8,05    | 45,07   | 12,03   | 9,25    | 6,17    | 37,60   |
| W50um203G_at    | um10330  | - related to AVT3 - Vacuolar transporter, involved i | 1,07  | 9,91E-01 | -1,8  | 4,16E-05 | 2,3  | 1,95E-06 | 450,45  | 826,37  | 408,60  | 482,25  | 468,40  | 945,40  |
| W84um003G_at    | um01964  | - related to multidrug resistance proteins           | -1,20 | 9,78E-01 | -1,9  | 7,79E-03 | 2,5  | 7,90E-04 | 64,45   | 171,23  | 75,70   | 56,45   | 91,13   | 193,23  |
| W10um213G_at    | um01122  | - conserved hypothetical protein                     | 1,15  | 9,78E-01 | -2,5  | 7,85E-05 | 3,1  | 3,06E-05 | 105,65  | 436,33  | 206,63  | 150,20  | 315,10  | 509,33  |
| W70um097G_at    | um01513  | - conserved hypothetical protein                     | -1,35 | 9,78E-01 | -2,5  | 1,56E-03 | 4,9  | 3,03E-05 | 35,05   | 309,57  | 73,67   | 25,55   | 123,03  | 344,13  |
| C70um120G_at    | um02720  | - conserved hypothetical protein                     | -1,07 | 9,91E-01 | -2,3  | 9,77E-06 | 1,9  | 1,50E-04 | 312,75  | 674,77  | 360,93  | 291,80  | 287,10  | 688,90  |
| W34um201G_at    | um11255  | - putative protein                                   | -1,13 | 9,78E-01 | -2,4  | 3,72E-05 | 1,8  | 8,39E-04 | 58,95   | 268,97  | 138,57  | 52,45   | 110,17  | 257,57  |
| W90um276G_at    | um02765  | - probable general amino acid permease               | -1,07 | 9,98E-01 | -2,4  | 3,72E-05 | 1,7  | 5,63E-05 | 65,60   | 371,90  | 176,00  | 57,60   | 104,20  | 214,87  |
| C75um191G_at    | um011348 | - conserved hypothetical protein                     | -1,08 | 9,98E-01 | -6,8  | 2,55E-04 | 4,2  | 2,49E-03 | 7,85    | 88,30   | 20,13   | 7,35    | 13,13   | 82,40   |
| W60um426G_at    | um04268  | - probable saccharopine dehydrogenase (NAD, L-ly     | -1,16 | 9,78E-01 | -2,5  | 1,19E-04 | 2,1  | 5,62E-04 | 1169,60 | 2707,23 | 1166,70 | 1012,90 | 1100,70 | 2478,73 |
| W85um165G_at    | um010430 | - probable GCY1 - glycine decarboxylase, subunit 1   | 1,07  | 9,91E-01 | -2,3  | 2,07E-05 | 2,1  | 6,35E-05 | 620,60  | 1033,40 | 571,77  | 668,30  | 470,17  | 1080,67 |
| C5um096G_at     | um03935  | - related to fructosyl amino acid oxidase            | 1,00  | 1,00E+00 | -4,8  | 1,04E-05 | 5,5  | 7,10E-06 | 367,10  | 1029,03 | 107,90  | 367,75  | 215,23  | 917,53  |
| W65um184G_at    | um06085  | - conserved hypothetical protein                     | 1,06  | 9,91E-01 | -2,9  | 1,14E-06 | 1,4  | 1,78E-05 | 182,60  | 894,30  | 209,40  | 82,85   | 60,13   | 137,27  |
| W45um057G_at    | um06085  | - conserved hypothetical protein                     | 1,26  | 9,78E-01 | -2,9  | 5,64E-04 | 1,4  | 2,09E-01 | 45,85   | 282,00  | 190,90  | 60,40   | 97,80   | 266,73  |
| W15um036G_at    | um02778  | - related to GCY1 - galactose-induced protein of alk | -1,03 | 9,98E-01 | -2,2  | 1,64E-04 | 1,4  | 3,02E-02 | 641,50  | 2255,40 | 1455,17 | 623,35  | 1055,43 | 2094,67 |
| W140um132G_at   | um05170  | - probable formate dehydrogenase                     | 1,12  | 9,89E-01 | -2,4  | 8,17E-05 | 2,0  | 6,11E-04 | 6,50    | 1188,17 | 768,93  | 7,50    | 504,33  | 1510,93 |
| CLUSTER2_RC_at  | um01984  | - related to Nicotianamide precursor                 | 1,03  | 9,91E-01 | -3,9  | 9,92E-03 | 3,0  | 2,54E-03 | 113,25  | 2269,27 | 1446,83 | 120,20  | 588,37  | 2251,53 |
| W60um089G_at    | um010815 | - conserved hypothetical protein                     | -1,10 | 9,94E-01 | -2,5  | 7,08E-04 | 1,3  | 2,73E-01 | 195,45  | 2836,70 | 2208,77 | 1151,35 | 1176,63 | 2786,93 |
| W5um166G_at     | um010104 | - probable GCY1 - galactose-induced protein of ald   | -1,25 | 9,78E-01 | -2,4  | 1,87E-04 | 1,4  | 2,41E-01 | 543,80  | 3174,97 | 2835,47 | 436,55  | 1359,57 | 3478,00 |
