# Supplementary material
Source: PubMed Central journal article supplement (PMC1693961)
Supplement: plntcell_tpc.106.043588_3.pdf [file plntcell_tpc.106.043588_3.pdf]

**Supplemental Table 2.** List of iron and Urbs1 repressed genes as deduced by microarray analysis\*.

| Probe set      | um-Number** | Annotation**                                             | Gene  | FB1+Fe/FB1-Fe |              | FB1+Fe/BW12+Fe |              | potential Urbs1<br>binding site** in<br>promotor region | Functional category**                                           |
|----------------|-------------|----------------------------------------------------------|-------|---------------|--------------|----------------|--------------|---------------------------------------------------------|-----------------------------------------------------------------|
|                |             |                                                          |       | Fold change   | Adj. p-value | Fold change    | Adj. p-value |                                                         |                                                                 |
| W170um132      | um10188     | - L-Ornithine N5-oxygenase                               | sid1  | -4.78         | 9.9E-03      | -2.60          | 1.0E-01      | Yes                                                     | Iron metabolism                                                 |
| C158um132      | um10189     | - Sid2 - Ferrichrome siderophore peptide synthetase      | sid2  | -6.73         | 1.8E-03      | -2.79          | 3.8E-02      | Yes                                                     | Iron metabolism                                                 |
| C120um049      | um00105     | - probable FET3 - cell surface ferroxidase, high affi... | fer1  | -10.84        | 2.6E-03      | -9.76          | 5.2E-03      | Yes                                                     | Iron metabolism                                                 |
| W125um049      | um10023     | - related to high-affinity iron permease                 | fer2  | -19.80        | 6.2E-03      | -15.88         | 1.4E-02      | Yes                                                     | Iron metabolism                                                 |
| C55um222       | um01434     | - related to Ferrichrome siderophore peptide synthetase  | fer3  | -66.05        | 1.0E-03      | -35.03         | 3.0E-03      | Yes                                                     | Iron metabolism                                                 |
| W60um222       | um01433     | - related to Enoyl-CoA hydratase, mitochondrial precu... | fer4  | -47.13        | 1.1E-04      | -31.60         | 1.3E-04      | Yes                                                     | Iron metabolism                                                 |
| C65um222       | um01432     | - related to N6-hydroxylysine acetyl transferase         | fer5  | -15.41        | 1.9E-04      | -13.35         | 1.6E-04      | Yes                                                     | Iron metabolism                                                 |
| W70um222       | um01431     | - related to ATP-binding cassette transporter protein... | fer6  | -10.68        | 7.1E-04      | -7.74          | 1.4E-03      | Yes                                                     | Iron metabolism                                                 |
| W75um222       | um11339     | - related to Siderophore iron transporter 3              | fer7  | -2.28         | 4.0E-02      | -1.95          | 1.2E-01      | Yes                                                     | Iron metabolism                                                 |
| W76um222       | um11338     | - conserved hypothetical protein                         | fer8  | -14.43        | 5.0E-04      | -11.15         | 6.4E-04      | No                                                      | Iron metabolism ?                                               |
| W27um222       | um01439     | - probable FRES - strong similarity to ferric reducta... | fer9  | -17.17        | 4.7E-04      | -24.64         | 1.8E-04      | Yes                                                     | Iron metabolism                                                 |
| C20um222       | um11873     | - hypothetical protein                                   | fer10 | -3.98         | 6.6E-03      | -12.56         | 6.0E-04      | Yes                                                     | Iron metabolism                                                 |
| C20um042       | um05689     | - conserved hypothetical protein                         |       | -23.50        | 8.9E-05      | -31.43         | 4.3E-05      | Yes                                                     | Fatty acid, lipid, isoprenoid metabolism                        |
| C10um114       | um05631     | - hypothetical protein                                   |       | -3.90         | 2.3E-02      | -3.08          | 7.7E-02      | Yes                                                     | ?                                                               |
| C35um051       | um03814     | - conserved hypothetical protein                         |       | -1.89         | 2.7E-02      | -2.92          | 5.2E-03      | Yes                                                     | ?                                                               |
| W10um134       | um05114     | - related to multidrug resistance protein 4              |       | -3.56         | 8.1E-03      | -2.28          | 7.5E-02      | Yes                                                     | Cellular transport, transport facilitation and transport routes |
| W20um029       | um11104     | - Nir1 - putative nitrite reductase                      | nir1  | -2.18         | 7.0E-02      | -205.94        | 3.6E-05      | No                                                      | Energy                                                          |
| C75um232       | um04523     | - Ump1 - Low Affinity Ammonium transporter               | ump1  | -1.95         | 9.5E-02      | -2.95          | 3.2E-02      | No                                                      | Interaction with the cellular environment                       |
| W155um099      | um05889     | - Ump2 - High Affinity Ammonium transporter              | ump2  | -1.85         | 3.6E-02      | -14.84         | 5.7E-05      | No                                                      | Cellular transport, transport facilitation and transport routes |
| C100um138      | um02626     | - conserved hypothetical protein                         |       | -1.77         | 1.7E-01      | -132.81        | 4.3E-05      | No                                                      | ?                                                               |
| W105um155      | um04971     | - related to fumarate reductase                          |       | -1.83         | 4.5E-01      | -20.86         | 1.4E-02      | No                                                      | Energy                                                          |
| C115um126      | um02191     | - conserved hypothetical protein                         |       | -19.20        | 1.2E-03      | -14.81         | 2.5E-03      | No                                                      | Transcriptional regulation                                      |
| C121um068      | um04910     | - conserved hypothetical protein                         |       | -2.08         | 1.7E-01      | -11.64         | 4.2E-03      | No                                                      | ?                                                               |
| C85um139       | um10242     | - putative protein                                       |       | -4.43         | 8.2E-02      | -9.56          | 3.3E-02      | No                                                      | ?                                                               |
| C65um280       | um00374     | - probable DAL5 - Allantoate and ureidosuccinate perm... |       | -1.72         | 1.6E-01      | -7.13          | 2.5E-03      | No                                                      | Cellular transport, transport facilitation and transport routes |
| C50um227       | um11815     | - related to Spindle pole body component alp4            |       | -10.28        | 2.2E-04      | -6.46          | 4.9E-04      | No                                                      | Cell cycle and DNA processing                                   |
| W125um148      | um00783     | - related to Heme oxygenase                              |       | -7.19         | 7.9E-04      | -5.99          | 1.4E-03      | No                                                      | Oxidative stress response                                       |
| W115um074      | um01812     | - conserved hypothetical protein                         |       | -1.98         | 5.9E-02      | -4.74          | 3.4E-03      | No                                                      | ?                                                               |
| W15um243       | um03682     | - conserved hypothetical protein                         |       | -1.76         | 1.6E-01      | -4.70          | 9.4E-03      | No                                                      | ?                                                               |
| W130um013      | um03523     | - probable aldehyde dehydrogenase                        |       | -3.68         | 2.6E-03      | -4.48          | 2.2E-03      | No                                                      | Energy and metabolism                                           |
| W25um043       | um02801     | - probable nadp-specific glutamate dehydrogenase         |       | -3.94         | 4.7E-03      | -4.24          | 6.4E-03      | No                                                      | Protein with binding function or cofactor requirement           |
| W55um283       | um00309     | - conserved hypothetical protein                         |       | -1.79         | 2.3E-01      | -4.02          | 3.4E-02      | No                                                      | ?                                                               |
| W16um071       | um10996     | - conserved hypothetical protein                         |       | -4.58         | 1.6E-02      | -4.00          | 3.9E-02      | No                                                      | ?                                                               |
| W40um198       | um06336     | - conserved hypothetical protein                         |       | -1.96         | 2.5E-02      | -3.61          | 2.6E-03      | No                                                      | ?                                                               |
| C110um096      | um11521     | - related to A/G-specific adenine DNA glycosylase        |       | -3.80         | 3.5E-02      | -3.57          | 6.9E-02      | No                                                      | Cell cycle and DNA processing                                   |
| C200um074      | um01793     | - probable AAD14 - Putative aryl-alcohol reductase       |       | -1.59         | 3.2E-01      | -3.53          | 4.6E-02      | No                                                      | Metabolism                                                      |
| C75um157       | um02172     | - related to methylglyoxal reductase (NADPH-dependent)   |       | -3.47         | 3.8E-02      | -3.31          | 7.2E-02      | No                                                      | Cell rescue, defense and virulence                              |
| W20um198       | um06340     | - hypothetical protein                                   |       | -4.73         | 2.7E-02      | -3.18          | 1.1E-01      | No                                                      | ?                                                               |
| W120um074      | um10248     | - hypothetical protein                                   |       | -1.91         | 8.4E-02      | -3.09          | 1.9E-02      | No                                                      | ?                                                               |
| W90um018       | um01194     | - putative protein                                       |       | -4.97         | 1.8E-03      | -3.03          | 1.4E-02      | No                                                      | ?                                                               |
| C10um259       | um10671     | - related to Pectin lyase B precursor                    |       | -3.42         | 2.0E-02      | -2.88          | 6.0E-02      | No                                                      | Lyases                                                          |
| W124um171      | um00072     | - conserved hypothetical protein                         |       | -2.34         | 5.3E-02      | -2.75          | 4.4E-02      | No                                                      | ?                                                               |
| C20um081       | um03232     | - conserved hypothetical Ustilago-specific protein       |       | -2.66         | 2.5E-02      | -2.66          | 4.3E-02      | No                                                      | Ca-binding                                                      |
| W110um122      | um01677     | - hypothetical protein                                   |       | -7.27         | 4.3E-03      | -2.64          | 1.0E-01      | No                                                      | ?                                                               |
| C49um146       | um05953     | - putative protein                                       |       | -3.06         | 1.8E-02      | -2.50          | 6.5E-02      | No                                                      | ?                                                               |
| GAP01um258w    | not found   | - no annotation available                                |       | -2.16         | 3.5E-02      | -2.44          | 3.3E-02      | ?                                                       | ?                                                               |
| C60um254       | um04833     | - probable isovaleryl-CoA dehydrogenase                  |       | -2.28         | 6.3E-03      | -2.34          | 9.6E-03      | No                                                      | Metabolism                                                      |
| C131um135      | um11137     | - hypothetical protein                                   |       | -2.84         | 3.4E-02      | -2.32          | 1.1E-01      | No                                                      | ?                                                               |
| W110um010      | um01257     | - related to peroxisomal ATP carrier                     |       | -2.09         | 1.9E-02      | -2.28          | 2.0E-02      | No                                                      | Metabolism                                                      |
| W140um086      | um06166     | - hypothetical protein                                   |       | -1.68         | 6.0E-02      | -2.25          | 1.8E-02      | No                                                      | ?                                                               |
| W35um143       | um10481     | - conserved hypothetical protein                         |       | -1.66         | 1.1E-01      | -2.22          | 4.3E-02      | No                                                      | ?                                                               |
| C89um269       | um10215     | - hypothetical protein                                   |       | -4.79         | 1.7E-02      | -2.12          | 2.8E-01      | No                                                      | ?                                                               |
| W40um066       | um04190     | - conserved hypothetical protein                         |       | -2.62         | 2.4E-02      | -2.06          | 1.0E-01      | No                                                      | ?                                                               |
| C40um056       | um01882     | - related to multidrug resistance proteins               |       | -2.02         | 2.1E-02      | -1.92          | 4.7E-02      | No                                                      | Cell rescue, defense and virulence                              |
| C155um019      | um06422     | - conserved hypothetical protein                         |       | -2.17         | 3.0E-02      | -1.87          | 1.0E-01      | No                                                      | ?                                                               |
| UG24-1d14-47c8 | um00813     | - conserved hypothetical protein                         |       | -3.66         | 8.0E-03      | -1.85          | 1.8E-01      | No                                                      | ?                                                               |
| C120um125      | um05299     | - putative protein                                       |       | -3.98         | 4.1E-02      | -1.83          | 4.7E-01      | No                                                      | ?                                                               |
| GAP01um210w    | not found   | - no annotation available                                |       | -2.29         | 2.5E-02      | -1.81          | 1.2E-01      | ?                                                       | ?                                                               |
| W60um225       | um02146     | - related to GABA permease                               |       | -3.66         | 6.3E-03      | -1.80          | 1.8E-01      | No                                                      | Cellular transport, transport facilitation and transport routes |
| C51um184       | um05508     | - probable GTP-binding protein 1                         |       | -2.84         | 2.6E-02      | -1.75          | 2.7E-01      | No                                                      | Protein with binding function or cofactor requirement           |
| W123um068      | um04912     | - putative protein                                       |       | -2.61         | 6.4E-03      | -1.74          | 9.2E-02      | No                                                      | ?                                                               |
| W26um091       | um02430     | - putative protein                                       |       | -3.20         | 1.9E-02      | -1.70          | 3.1E-01      | No                                                      | Heavy metal transport/detoxification                            |
| C240um074      | um01784     | - probable GPX2 - glutathione peroxidase                 |       | -2.52         | 3.4E-02      | -1.61          | 3.2E-01      | No                                                      | Cell rescue, defense and virulence                              |
| W25um140       | um10665     | - related to acyl-CoA dehydrogenase                      |       | -2.17         | 1.6E-02      | -1.59          | 1.4E-01      | No                                                      | Fatty acid, lipid, isoprenoid metabolism                        |
| W170um074      | um01799     | - putative protein                                       |       | -1.70         | 1.8E-02      | -1.57          | 1.2E-01      | No                                                      | ?                                                               |
| C75um228       | um10273     | - related to DELTA3,5-DELTA2,4-DIENOYL-CoA ISOMERASE ... |       | -2.14         | 8.0E-03      | -1.55          | 1.0E-01      | No                                                      | Energy                                                          |
| W5um259        | um04707     | - conserved hypothetical protein                         |       | -2.17         | 1.2E-02      | -1.53          | 1.6E-01      | No                                                      | ?                                                               |

\* Data were filtered for a fold change of < -1.50 for both comparisons and an adjusted p-value of < 0.05 for at least one of the two comparisons. Microarray data were submitted to the NCBI GEO database under the accession numbers GSE6037 and GSE6038.

\*\* MUMDB (<http://mips.gsf.de/genre/proj/ustilago/>), (10/2006)

\*\*\*Extended Urbs1 consensus as defined in this work (ATCG/TGATAAA/G).
